# Supplementary material
Source: PubMed Central journal article supplement (PMC11495359)
Supplement: NIHPP2024.04.18.590103v2-supplement-1.pdf [file NIHPP2024.04.18.590103v2-supplement-1.pdf]

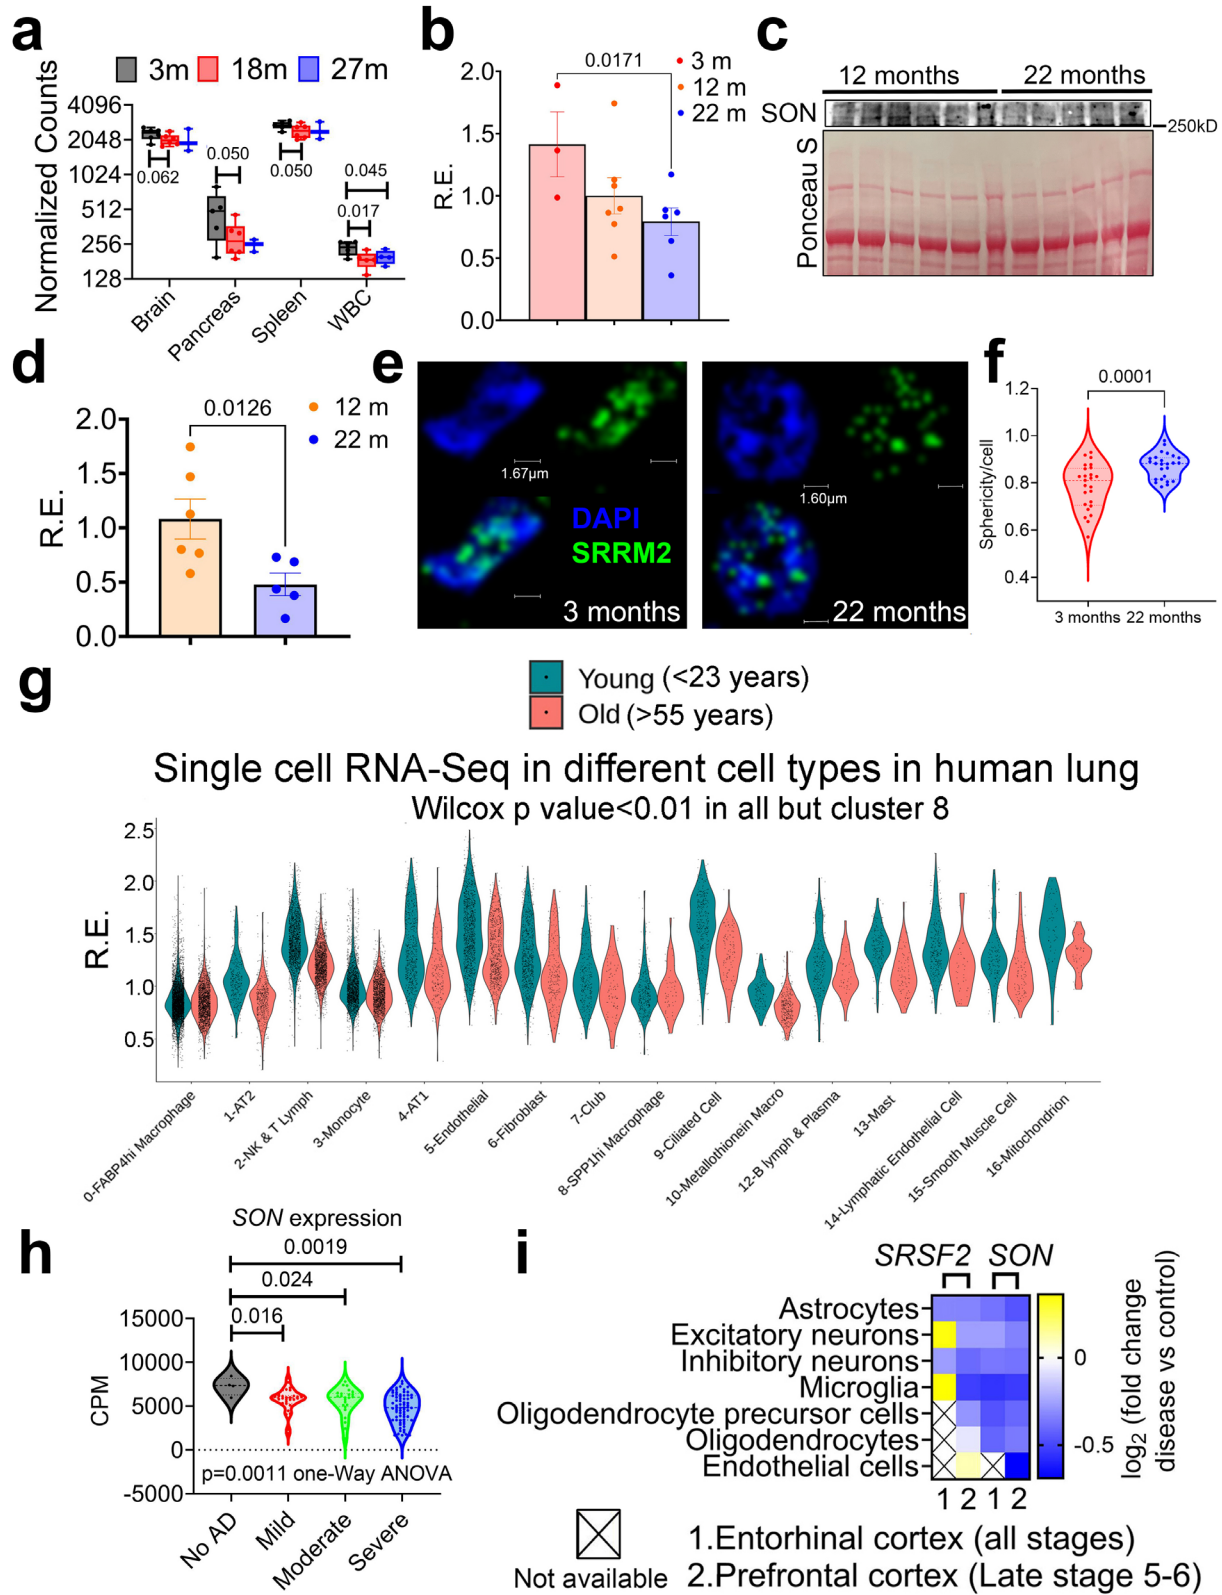

1731

1732 **Supplementary Figure 1. SON expression is reduced during aging in mice and humans. (a)**  
 1733 Normalized counts of *Son* mRNA in different mouse tissues with different ages (WBC; White blood

1734 cells) according to Tabula Muris Senis database (n=3~6)<sup>132, 133</sup>. **(b)** qPCR of *Son* level in liver of  
1735 mice with different ages (n=3~7). **(c, d)** Western blot **(c)** and quantification **(d)** of SON level in  
1736 liver of mice with different ages (n=5~6). **(e, f)** Representative immunofluorescence images of  
1737 SRRM2 and DAPI in the liver of 3 and 22 months old male mice **(e)** and quantification of the  
1738 sphericity of nuclear speckles **(f)**. n=25 for both age groups. **(g)** Single cell RNA-seq data of SON  
1739 mRNA level in different cell types in lung tissues of young and aging humans, reported from<sup>20</sup>.  
1740 **(h)** Counts per million normalized expressions of SON in brains of human AD compiled from RNA-  
1741 seq data from the AMP-AD consortium. **(i)** Heat map showing relative expression of *SRSF2* and  
1742 SON in different cell types in the cortex of human AD subjects<sup>134</sup>. Blue color indicates lower level  
1743 in AD subjects compared to controls. Data: Mean ± S.E.M. Statistical tests used: two-way ANOVA  
1744 and Turkey multiple comparison for h, unpaired one-tailed Student's t-test for a, b, d, and f.  
1745 Wilcoxon test for g.

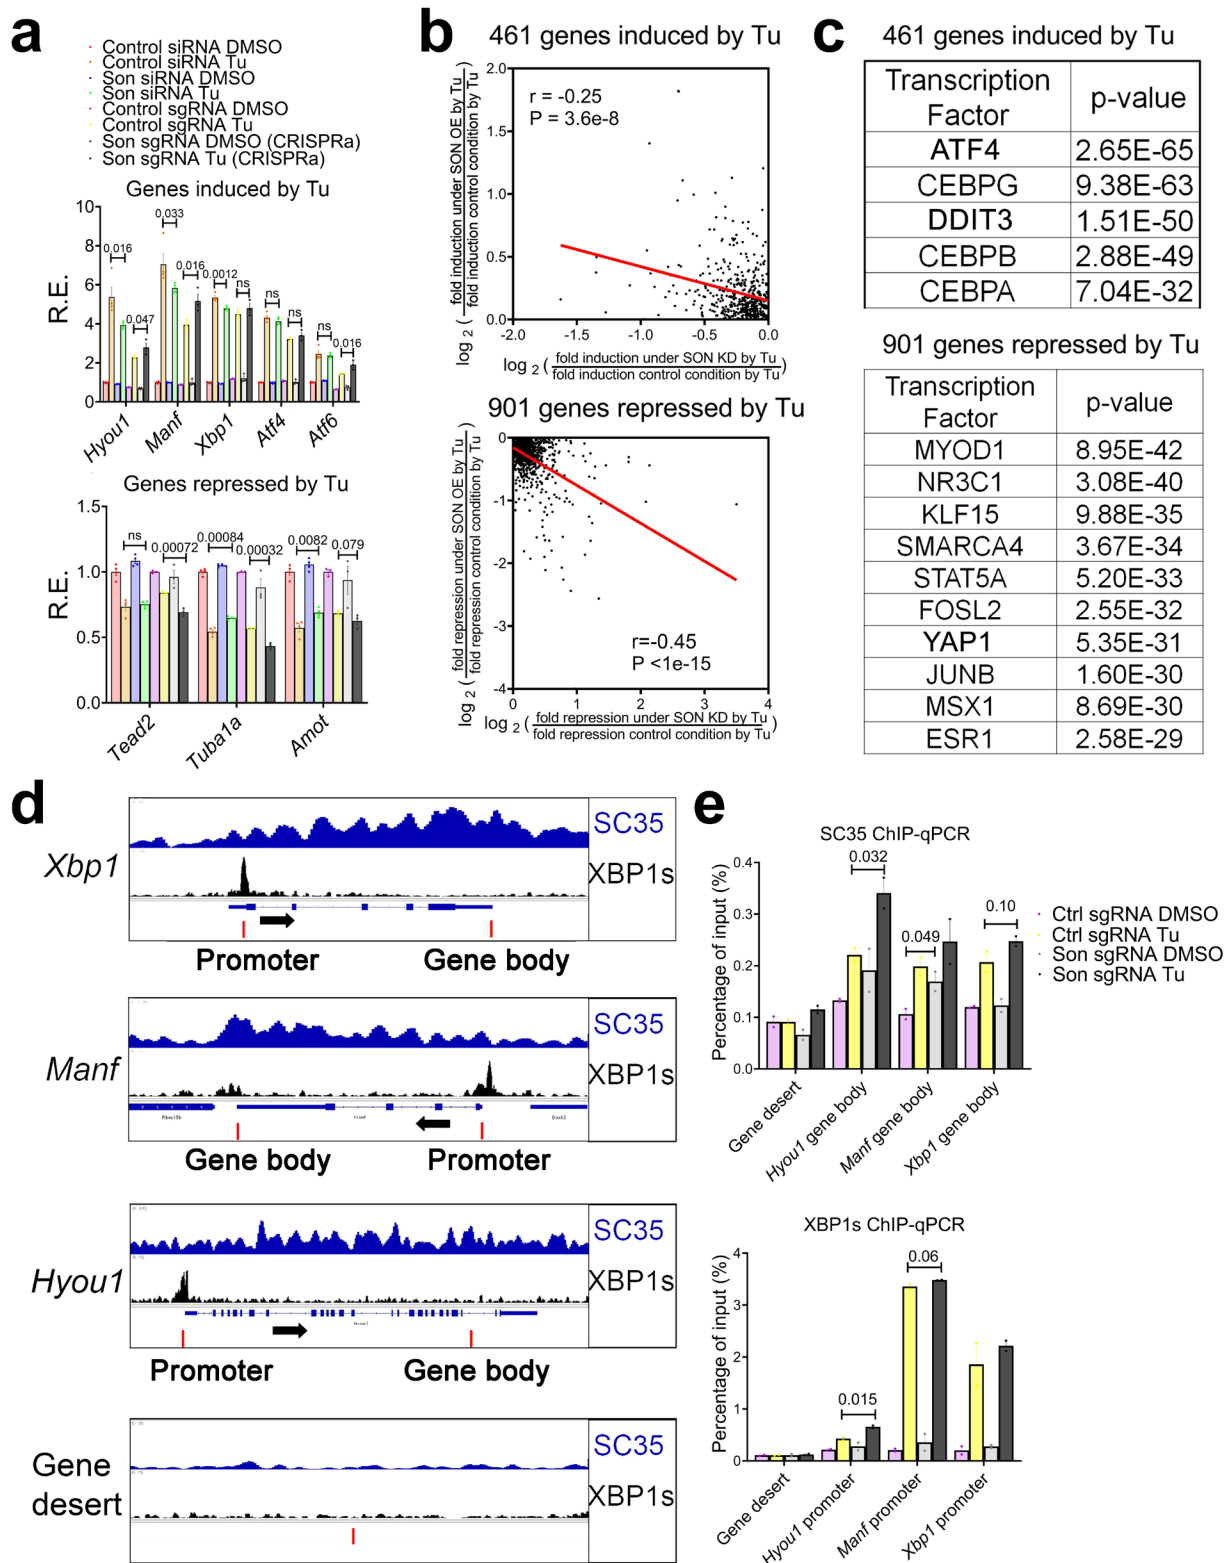

1746

1747 **Supplementary Figure 2. Genetic rejuvenation of nuclear speckles by SON.** (a) Relative  
 1748 expression (R.E.) of representative proteostasis genes (top) and YAP1 target genes (bottom) in

1749 response to Tu in the presence of SON OE/KD (n=4 for SON KD and n=3 for SON OE). **(b)**  
1750 Scatter plot showing relative fold change by *Son* KD versus SON OE for both Tu-induced and Tu-  
1751 repressed genes. **(c)** Top predicted transcription regulators of 461 and 901 genes by the LISA  
1752 Cistrome DB TR ChIP-Seq models. **(d, e)** Selected genes aligned for SC35 and XBP1s ChIP-seq  
1753 signal from CT12 in XBP1<sup>Flox</sup> mice <sup>6</sup> **(d)** and ChIP-qPCR of XBP1s and SC35 on selected regions  
1754 (indicated by red bars) (n=2) **(e)**. Data: Mean ± S.E.M. Statistical tests used: unpaired one-tailed  
1755 Student's t-test for a and e. Linear regression for b.

1756

1757

1758

1759

1760

1761

1762

1763

1764

1765

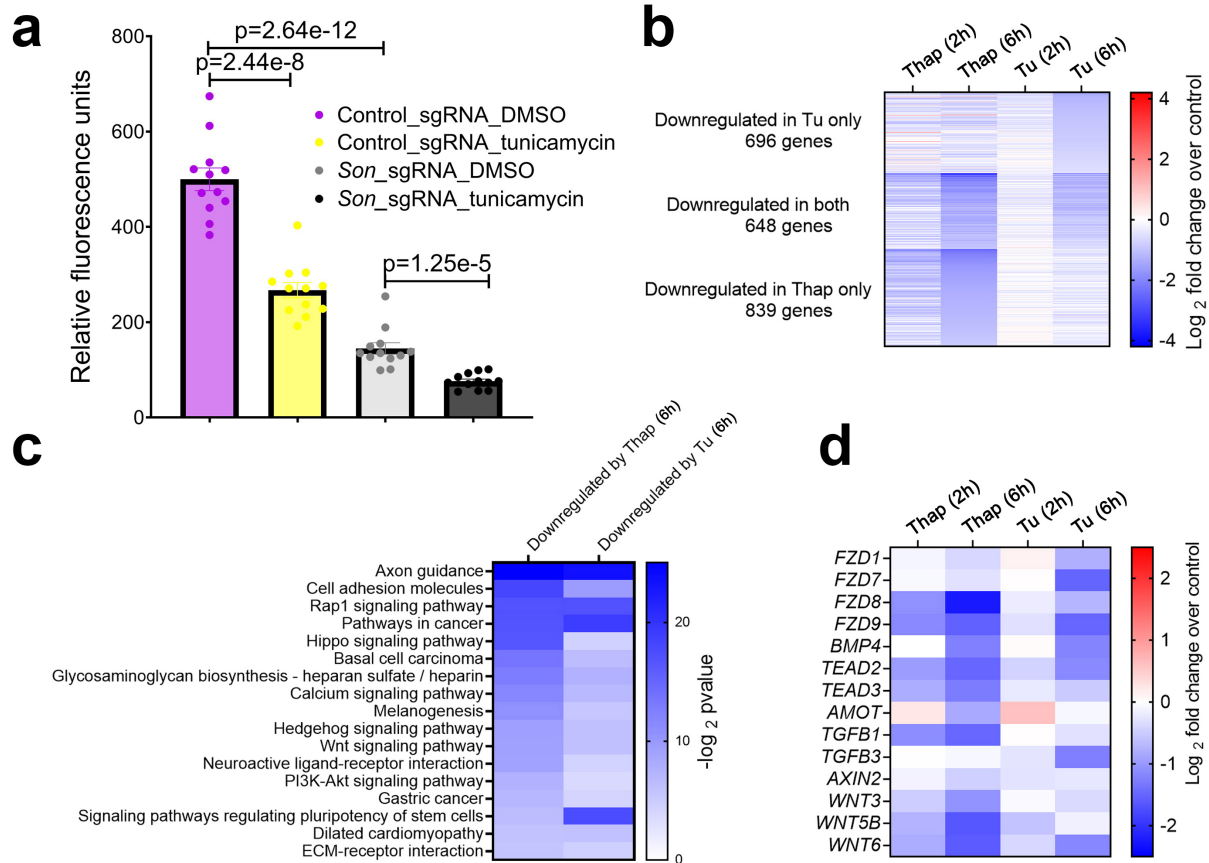

1766

1767 **Supplementary Figure 3. YAP1 transcriptional output is repressed during ER stress. (a)**  
 1768 TEAD luciferase reporter assay in control and SON OE MEFs in response to Tu (n=12 for all  
 1769 groups). **(b)** Heatmap showing transcriptomes that are significantly downregulated (log<sub>2</sub>-fold  
 1770 change smaller than -0.5) with a p value less than 0.05) either under Tu or Thap treatment at 6h.  
 1771 **(c)** GO analysis of genes that are significantly downregulated either under Tu ± or Thap treatment  
 1772 at 6h. **(d)** Heatmap of representative YAP1 target genes as in **b**. Data: Mean ± S.E.M. Statistical  
 1773 tests used: unpaired one-tailed Student's t-test for a.

1774

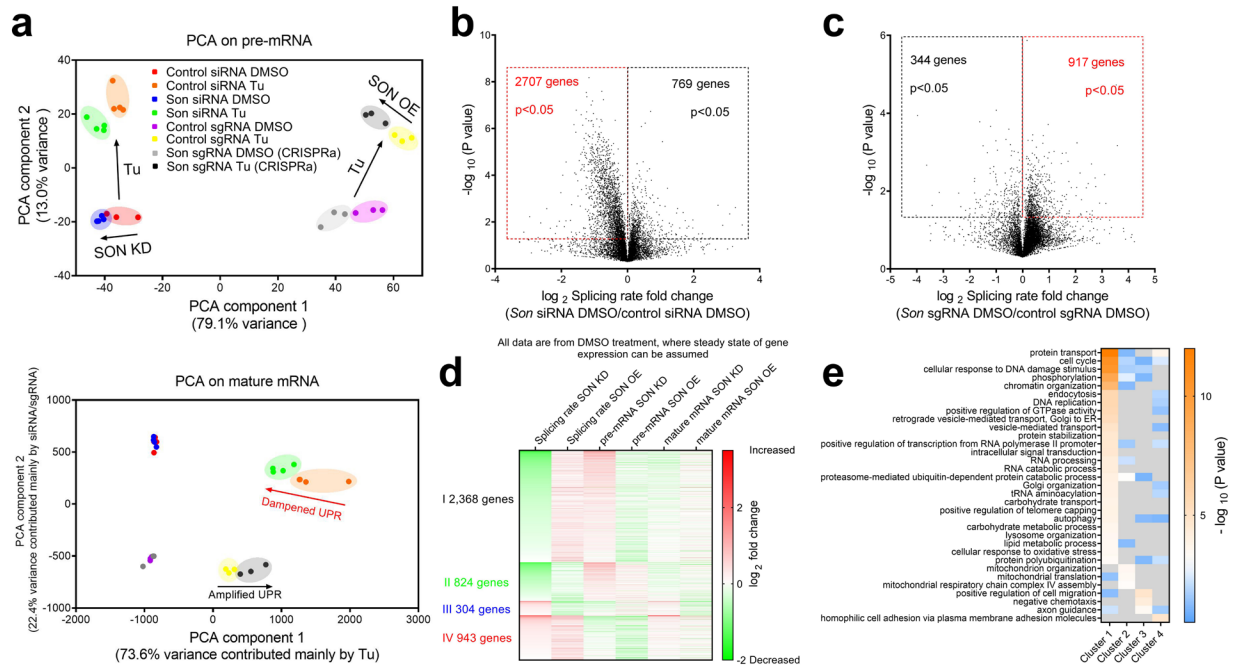

1775

1776 **Supplementary Figure 4. SON regulates mRNA splicing rates under both basal and ER**  
 1777 **stress conditions (a)** PCA analysis of global transcriptional response to Tu in the presence of  
 1778 SON OE/KD. Both pre-mRNA (top) and mature mRNA (bottom) are shown. **(b, c)** Volcano plot of  
 1779 mRNA splicing rates changes in SON KD **(b)** or OE **(c)** MEFs under basal condition (DMSO). **(d)**  
 1780 Heat map of fold change of RNA splicing rate, pre and mature mRNA level in SON OE/KD MEFs  
 1781 compared to control MEFs under vehicle (DMSO) condition. Four clusters of genes are shown.  
 1782 **(e)** GO analysis of genes in four clusters showing enriched KEGG pathways.

1783

1784

1785

1786

1787

1788

1789

1790

1791

1792

1793

1794

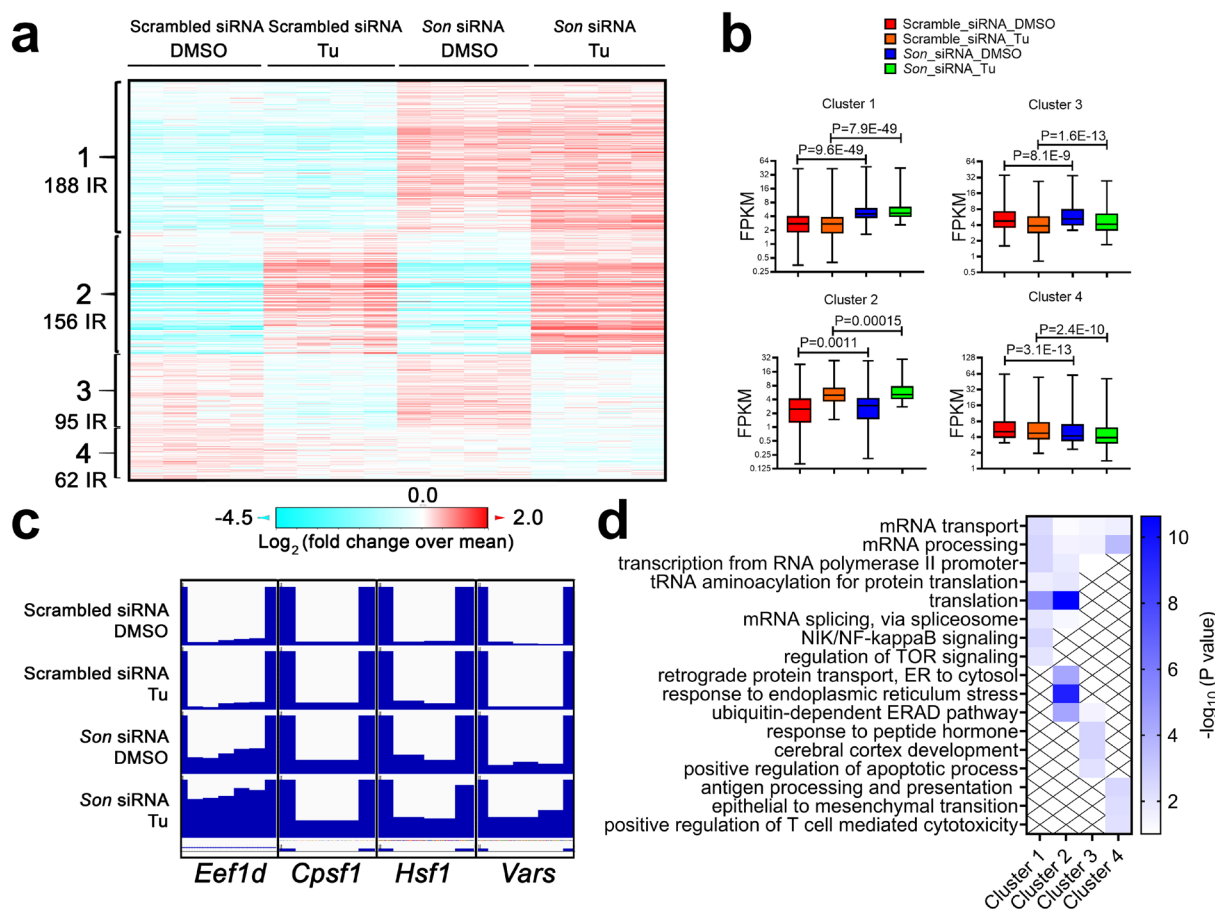

1795

1796 **Supplementary Figure 5. SON knockdown increases intron retention of proteostasis and**  
 1797 **mRNA metabolism genes.** Heat map (a) and quantification (b) of intron retention events in MEFs  
 1798 with control or SON KD under basal (DMSO) and Tu conditions. Four clusters are shown. (c) The  
 1799 Integrative Genome Viewer representation of intron retention in selected genes. (d) GO analysis  
 1800 of genes in four clusters showing enriched KEGG pathways. Data: box and whiskers with  
 1801 minimum to maximum. Statistical tests used: unpaired one-tailed Student's t-test for b.

1802

1803

1804

1805

1806

1807

1808

1809

1810



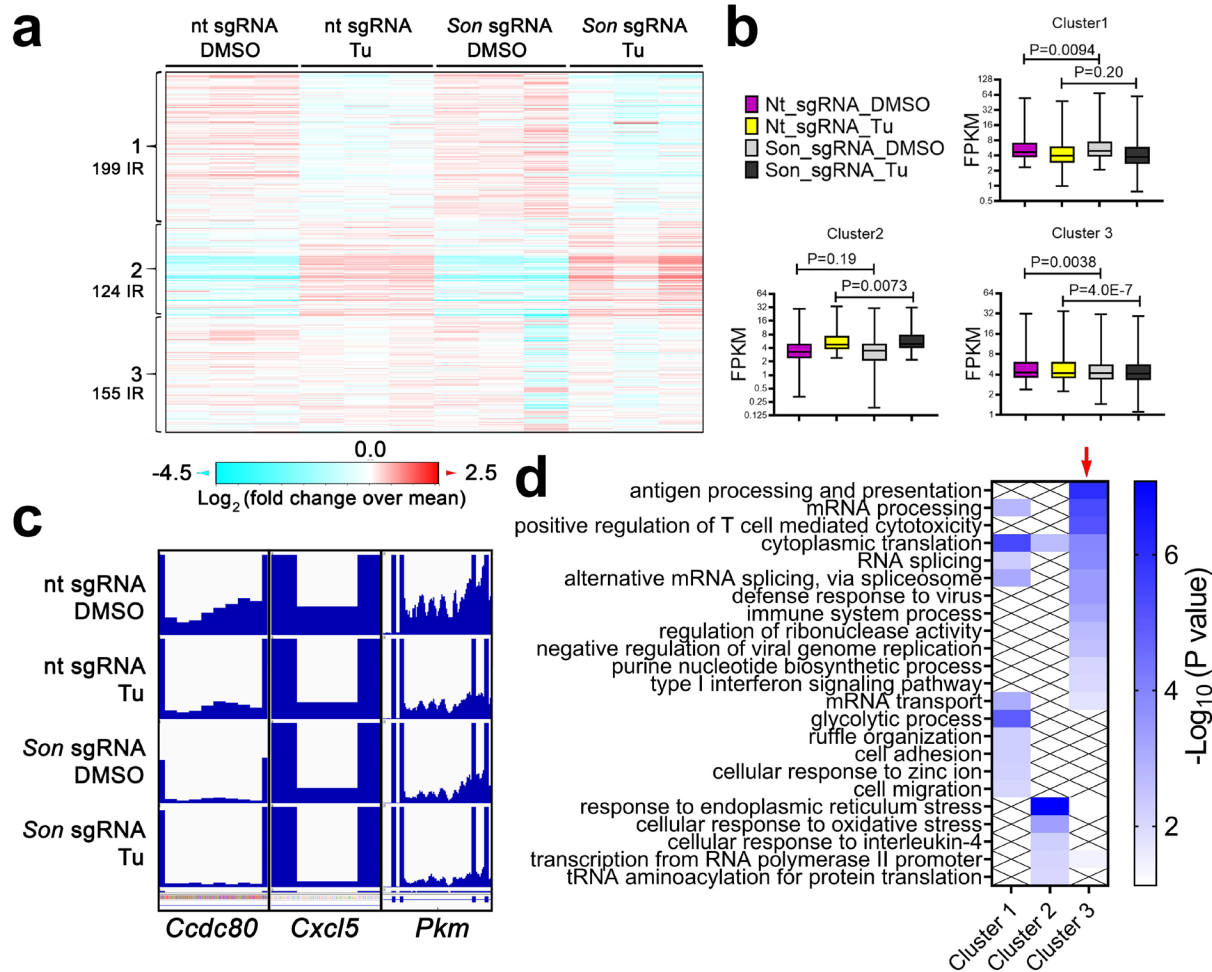

1811

1812 **Supplementary Figure 6. SON overexpression decreases intron retention of protein**  
 1813 **processing and mRNA metabolism genes.** Heat map (a) and quantification (b) of intron  
 1814 retention events in MEFs with control or SON overexpression under basal (DMSO) and Tu  
 1815 conditions. Three clusters are shown. (c) The Integrative Genome Viewer representation of intron  
 1816 retention in selected genes. (d) GO analysis of genes in three clusters showing enriched KEGG  
 1817 pathways. Data: box and whiskers with minimum to maximum. Statistical tests used: unpaired  
 1818 one-tailed Student's t-test for b.

1819

1820

1821

1822

1823

1824

1825

1826

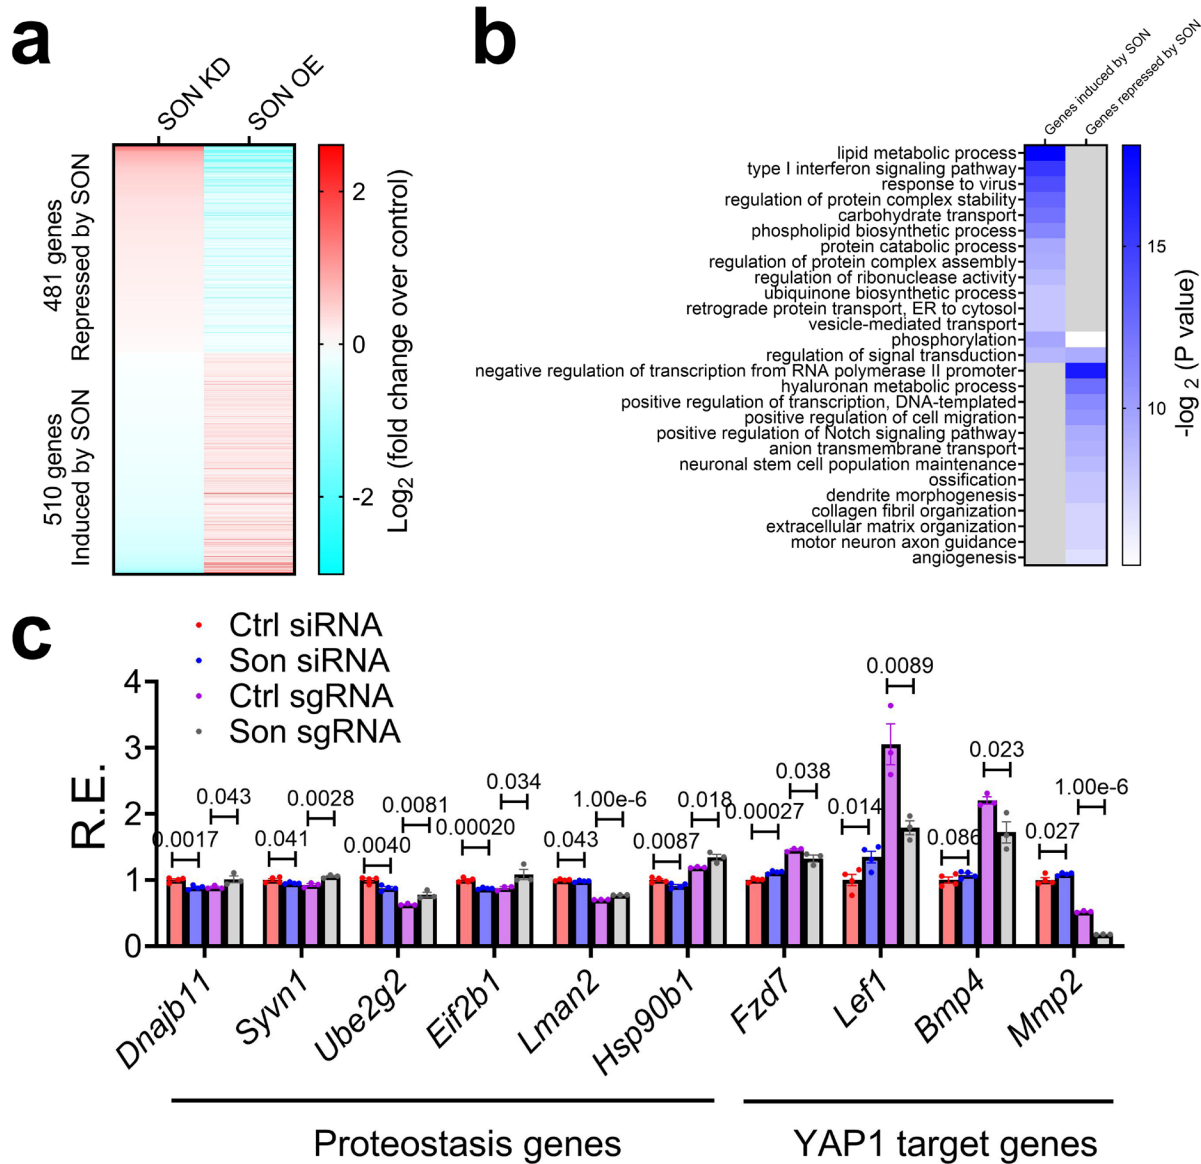

1827

1828 **Supplementary Figure 7. SON reprograms opposing proteostasis and YAP1 transcriptional**  
 1829 **output under basal conditions.** (a) Heat map of fold change of mature mRNA level in *Son*  
 1830 OE/KD MEFs compared to control MEFs under vehicle (DMSO) condition. All mature mRNAs in  
 1831 this heatmap are statistically differentially expressed ( $P < 0.05$ ) in both SON OE/KD conditions,  
 1832 compared to their respective controls. (b) GO analysis of these 481 and 501 genes. (c)  
 1833 Representative mature mRNA expression of proteostasis and YAP1 target genes ( $n = 4$  for Ctrl  
 1834 and *Son* siRNA and  $n = 3$  for Ctrl and *Son* sgRNA). Data: Mean  $\pm$  S.E.M. Statistical tests used:  
 1835 unpaired one-tailed Student's t-test for c.

1836

1837

1838

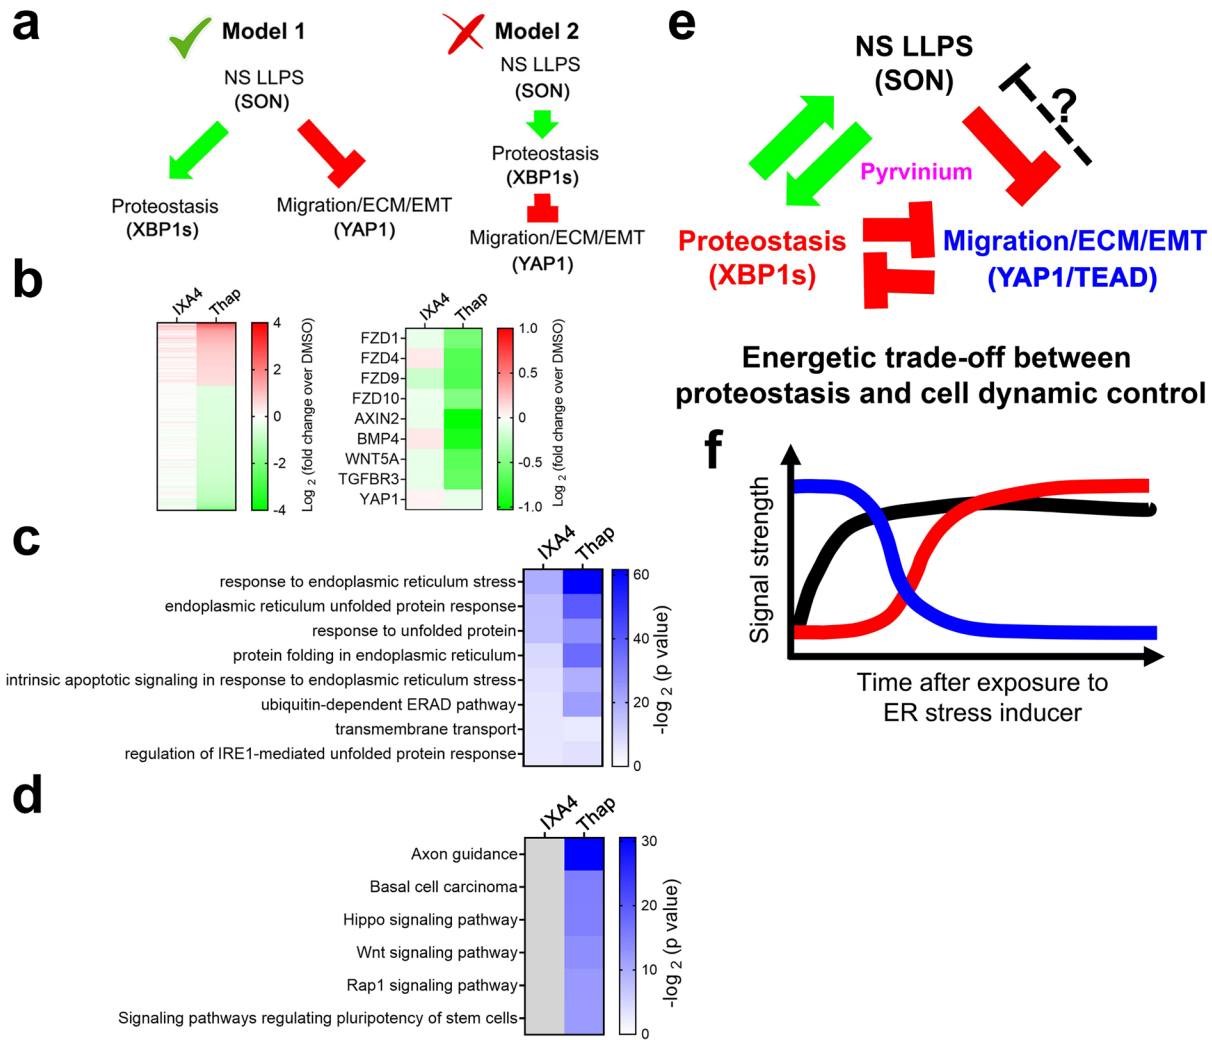

1839

1840 **Supplementary Figure 8. Nuclear speckle LLPS dictates opposing proteostasis and YAP1**  
 1841 **signaling.** (a) Two models explaining the relationship among nuclear speckles LLPS dynamics,  
 1842 proteostasis and YAP1 transcriptional output. Our results support model 1. (b) Heatmap  
 1843 demonstrates relative fold change of gene expression relative to DMSO control in IXA4, or Thap  
 1844 treated HEK293T cells. All genes induced or repressed by at least 1.41-fold with p value smaller  
 1845 than 0.05 in Thap condition (left), and representative YAP1-related genes (right). (c, d) GO  
 1846 analysis of all upregulated (c) or downregulated (d) genes in either IXA4 or Thap treatment by at  
 1847 least 1.41-fold with a p-value smaller than 0.05. (e) An expanded model of how the LLPS of  
 1848 nuclear speckles can dictate proteostasis and YAP1 transcriptional output. Please see the main  
 1849 text for details. (f, g) Diagram showing temporal changes of NS' LLPS (black), proteostasis (red)  
 1850 and YAP1 transcriptional output (blue) signal during ER stress (f).

1851

1852

1853

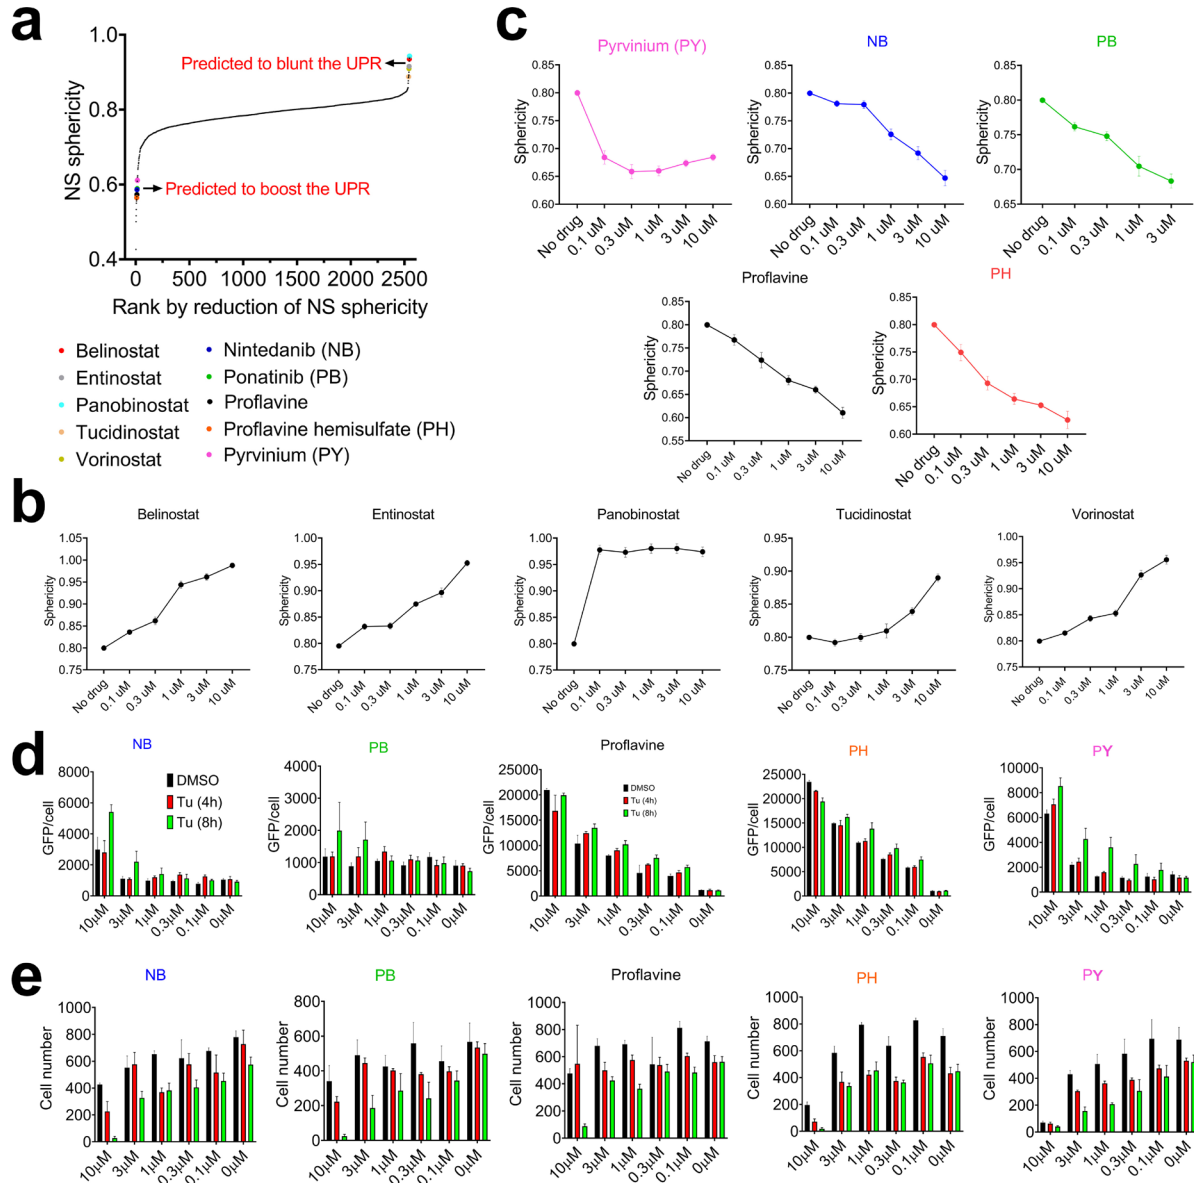

1854

1855 **Supplementary Figure 9. HTS identifies compounds that alter nuclear speckle morphology**  
 1856 **and the UPR.** (a) Compounds in the FDA-approved library ranked from lowest to highest on their  
 1857 ability to reduce NS sphericity. (b) Five drugs are shown to have a dose-dependent effect on  
 1858 increasing sphericity of NS (n=16). (c) Dose-dependent effects of drugs on decreasing NS  
 1859 sphericity (n=16). (d, e) GFP/cell (d) or cell number (e) measured in *Perk* promoter-driven dGFP  
 1860 reporter MEFs in the presence of Tu for four or eight hours after pre-treatment of different  
 1861 concentrations of drugs or DMSO for 24 hours (n=4). Data: Mean  $\pm$  S.E.M.

1862

1863

1864

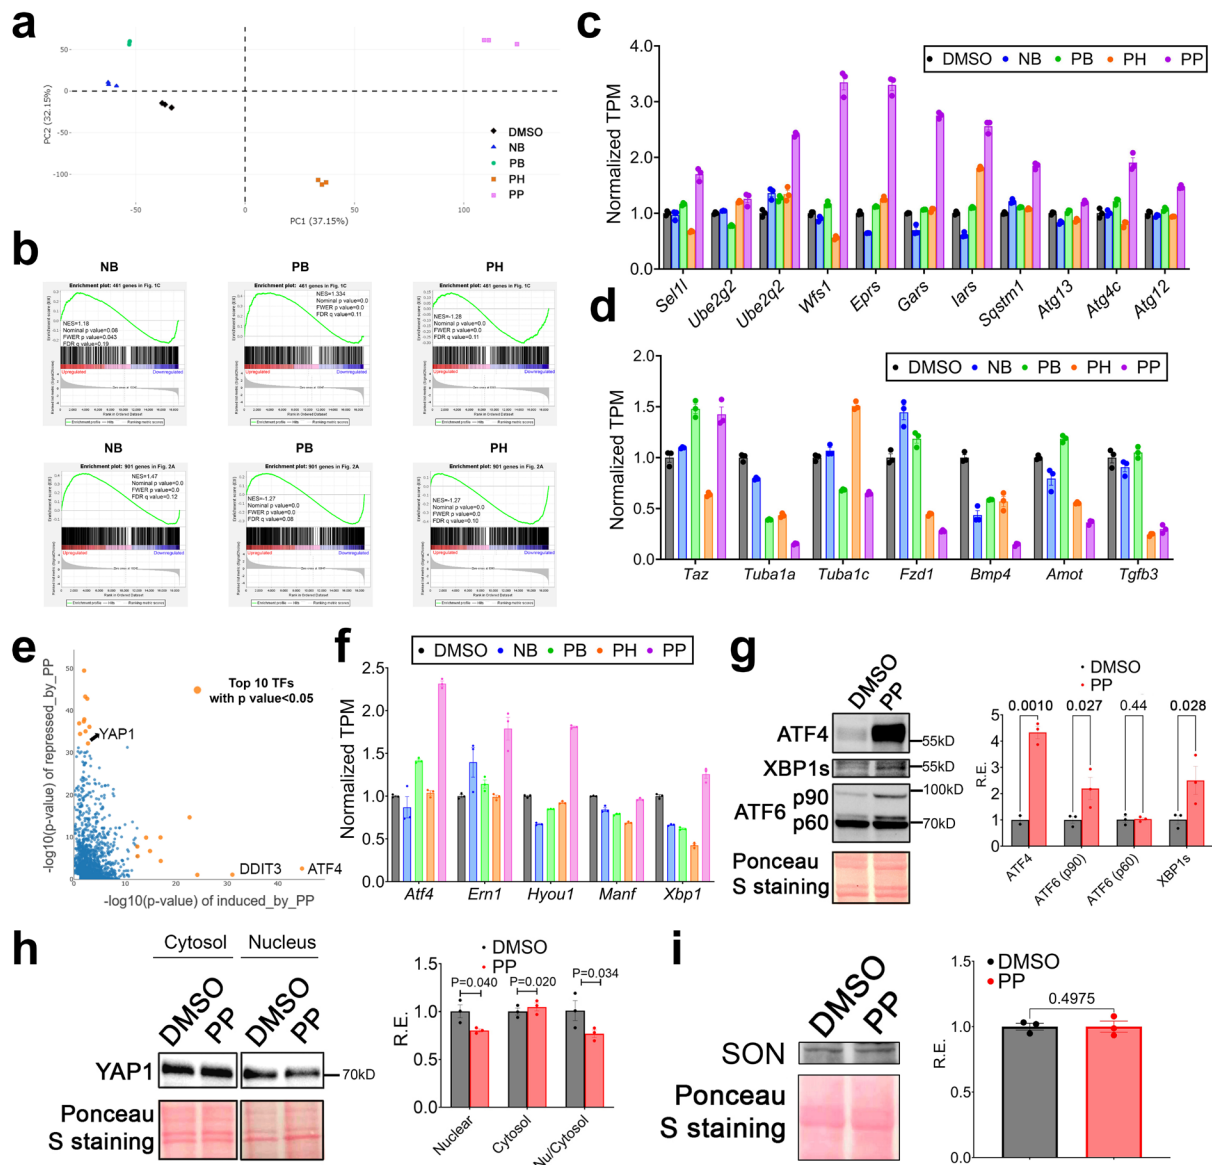

1865

1866 **Supplementary Figure 10. PP is a bona fide nuclear speckle rejuvenator.** (a) MEFs were  
 1867 treated with 3  $\mu$ M NB, 1  $\mu$ M PB, 3  $\mu$ M PH, and 1  $\mu$ M PP for 24 hours and RNA-seq was performed.  
 1868 PCA of global transcriptional response to drug treatments. (b) For each of the GSEA analysis,  
 1869 genes further activated by SON OE or further repressed by SON OE are compared to the  
 1870 transcriptome signatures of MEFs under different drug treatments. (c, d) Gene expression of  
 1871 select protein quality control (c) and YAP1 target genes (d) genes determined through mRNA-  
 1872 Seq (n=3). (e) LISA analysis listing log transformed p values for top predicted transcription  
 1873 regulators for genes upregulated (x-axis) and downregulated (y-axis) by PP. (f) Gene expression  
 1874 of select UPR genes determined through mRNA-Seq under different drugs treatment (n=3). (g-i)  
 1875 Western blot and quantification of UPR TFs (g), YAP1 nuclear and cytosol (h) and SON (i) level  
 1876 in response to 1  $\mu$ M PP for 24 hours (n=3). Data: Mean  $\pm$  S.E.M. Statistical tests used: unpaired  
 1877 one-tailed Student's t-test for g-i.

1878

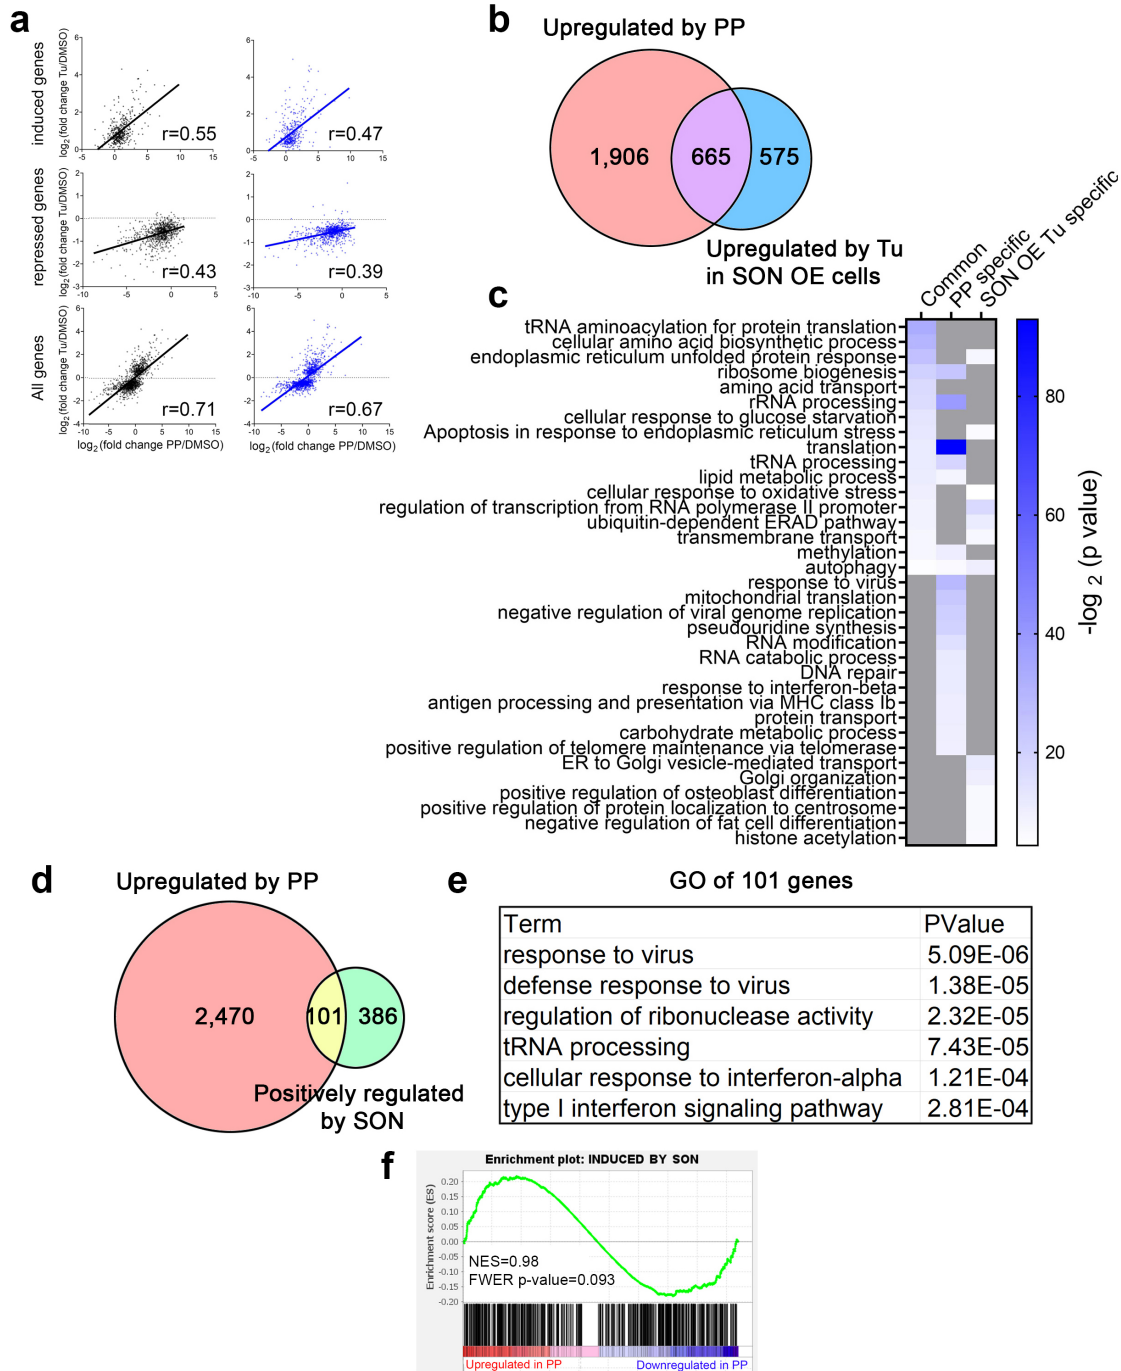

1879

1880 **Supplementary Figure 11. Comparison of upregulated genes by PP and SON OE.** (a) Scatter  
 1881 plot comparing the fold change of gene expression by PP (x-axis) and by Tu (y-axis) under SON  
 1882 OE or SON KD condition. Correlation coefficient and p value are shown for each plot. Chow test  
 1883 indicates statistically significant coefficients between the two linear regressions with  $p=0.00195$ .  
 1884 (b, c) Venn diagram showing (b) and GO analysis of (c) specific and commonly upregulated  
 1885 genes by PP and Tu in SON OE MEFs. (d) Venn diagram showing specific and common  
 1886 upregulated genes by PP and SON in MEFs. (e) GO analysis of common 101 genes. (f) GSEA  
 1887 analysis comparing genes upregulated by SON with those regulated by PP.

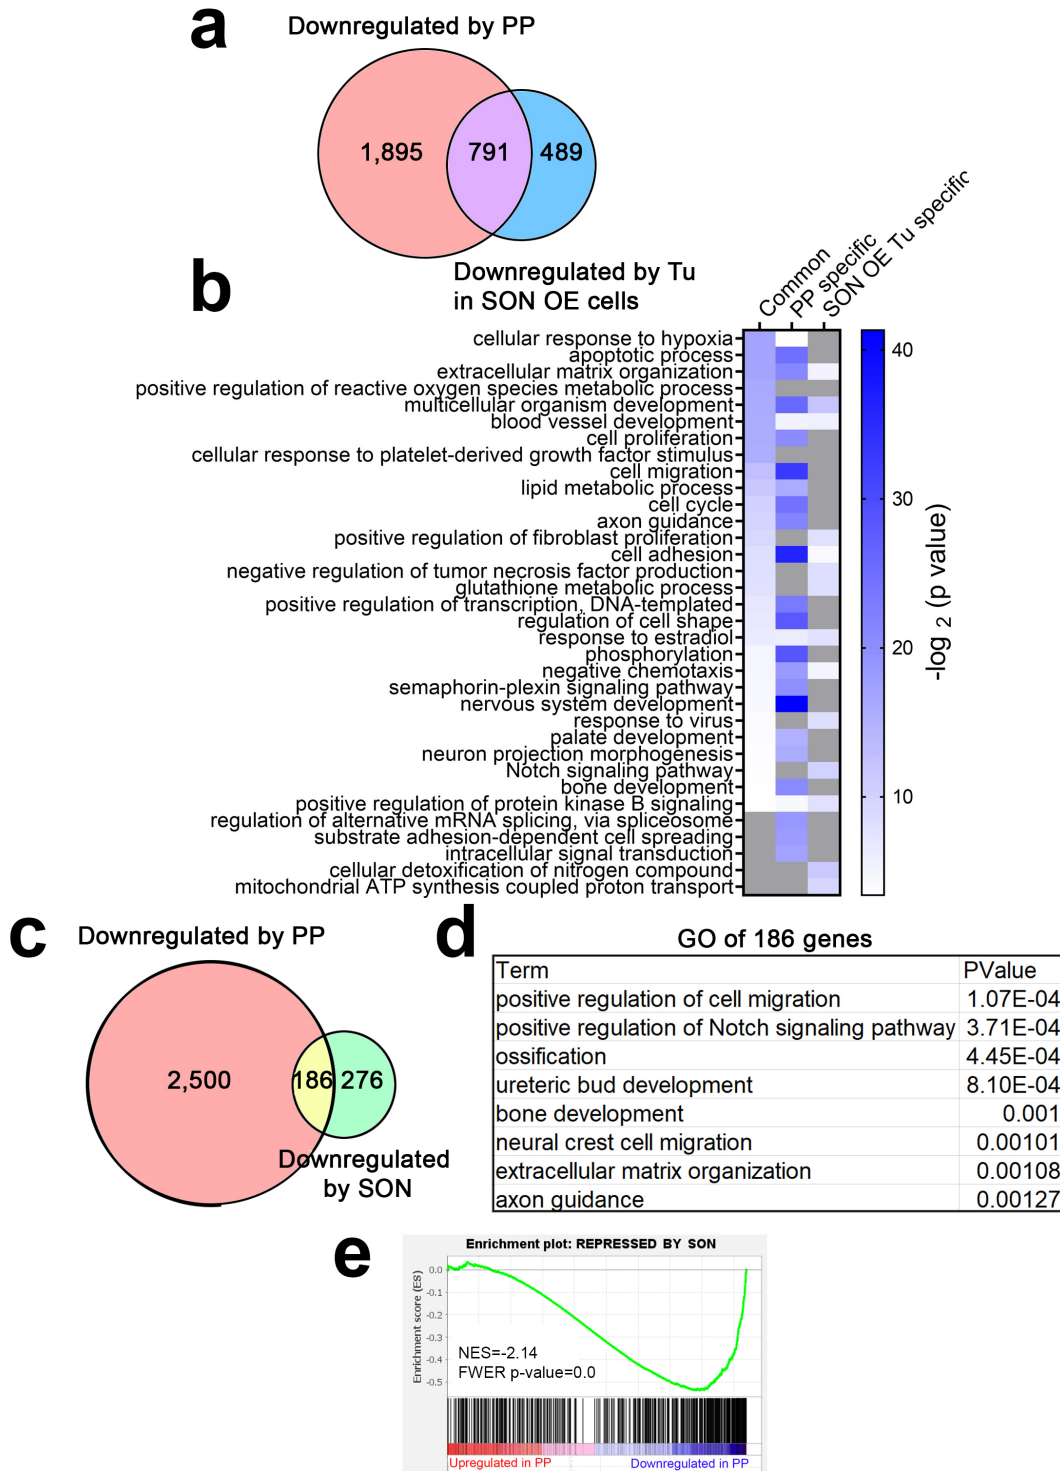

1888

1889 **Supplementary Figure 12. Comparison of downregulated genes by PP and SON OE.** (a-b)  
 1890 Venn diagram showing (a) and GO analysis of (b) specific and common downregulated genes by  
 1891 PP and Tu in SON OE MEFs. (c) Venn diagram showing specific and common downregulated  
 1892 genes by PP and SON in MEFs. (d) GO analysis of 186 common genes. (e) GSEA analysis  
 1893 comparing genes downregulated by SON with those regulated by PP.

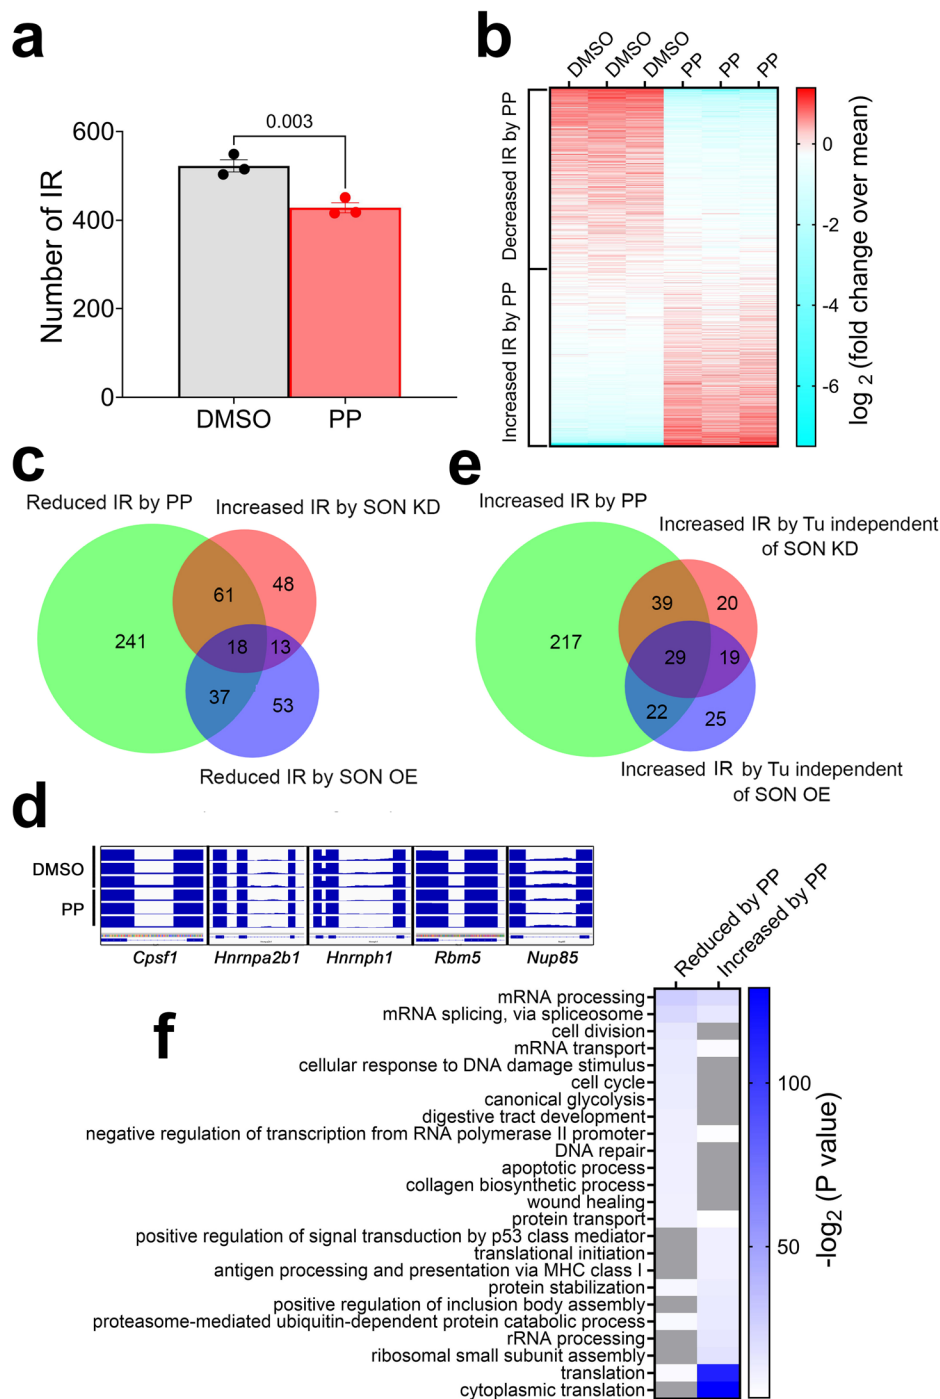

1894

1895 **Supplementary Figure 13. Comparison of intron retention (IR) events among PP, SON OE**  
 1896 **and SON KD.** (a) Quantification of IR under DMSO and PP condition (n=3). (b) Heatmap showing  
 1897 RPKM normalized level of retained introns in DMSO and PP condition. (c, d) Venn diagram  
 1898 comparing genes with specific or common IRs between different conditions. (e) Genome browser  
 1899 view of selective genes with reduced IR by PP. (f) GO analysis of genes with increased or reduced  
 1900 IR by PP. Data: Mean ± S.E.M. Statistical tests used: unpaired one-tailed Student's t-test for a.

1901



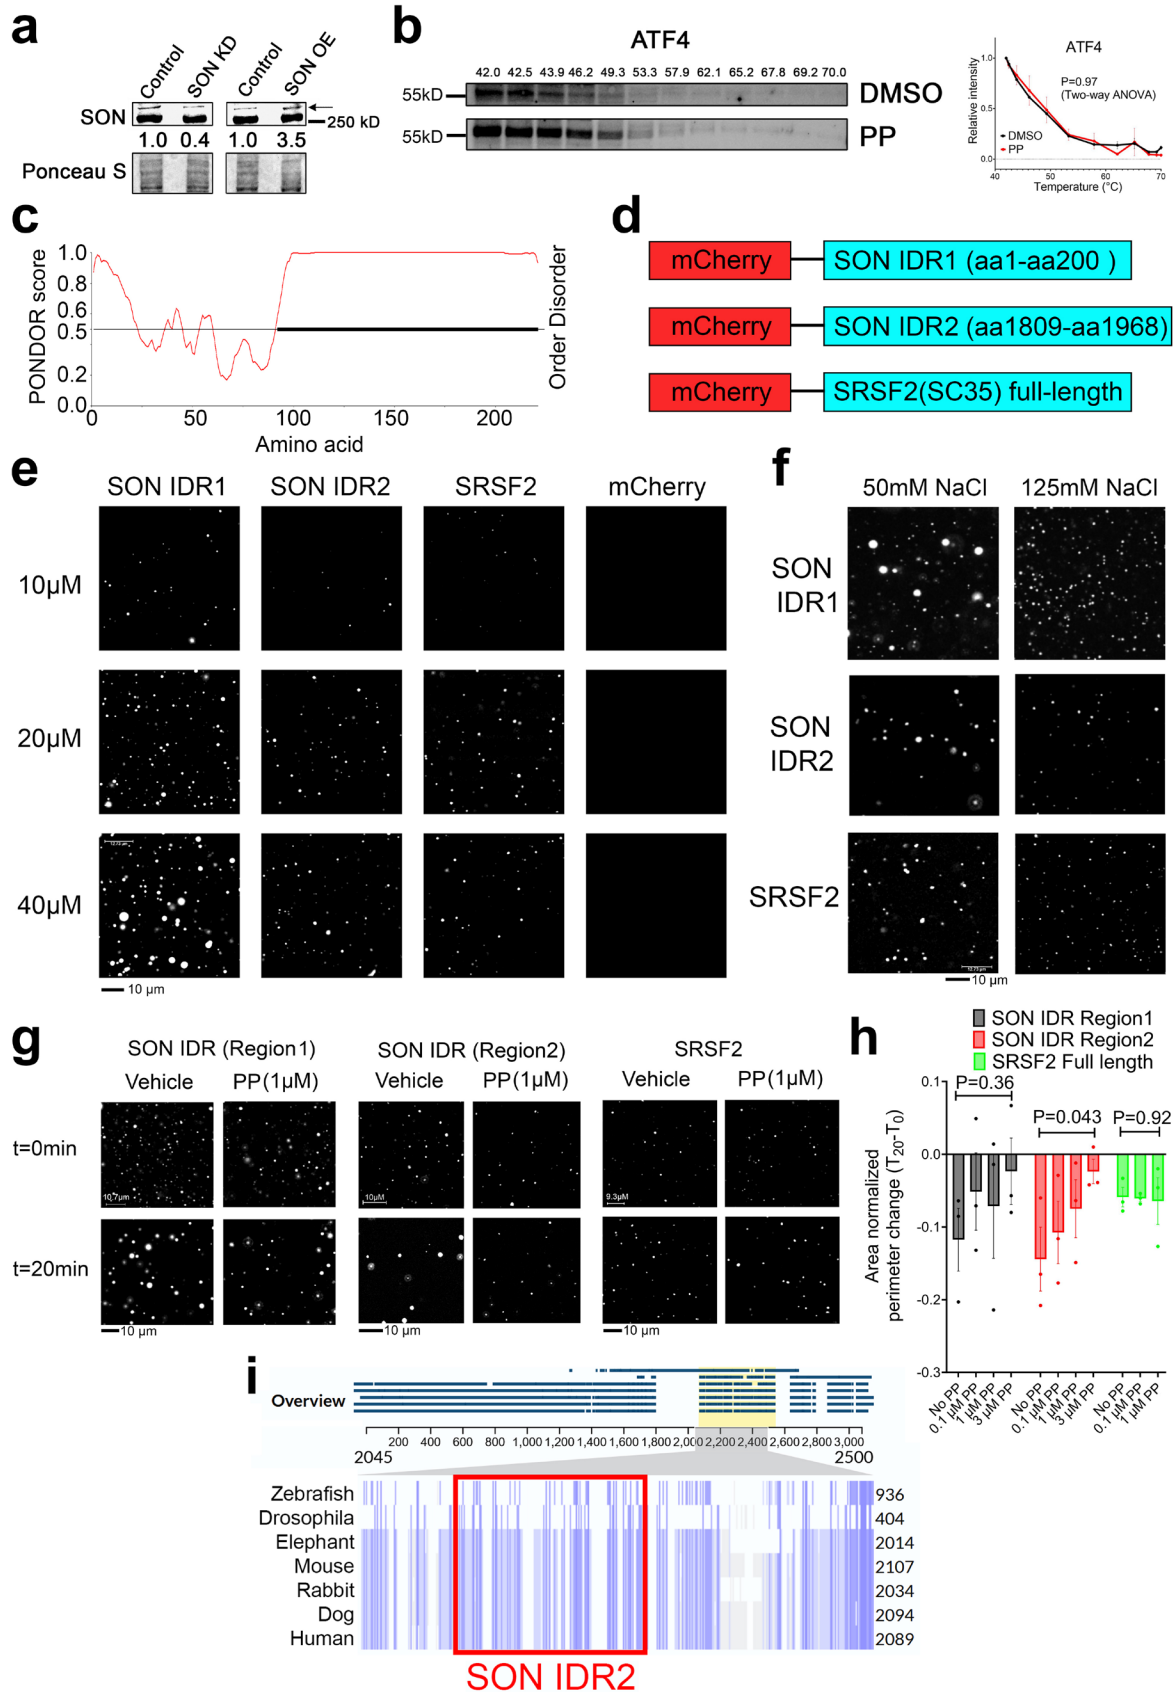

1903 **Supplementary Figure 14. PP directly targets SON to modulate nuclear speckle LLPS**  
1904 **dynamics.** (a) Western blots of SON with siRNA-mediated knockdown and SON OE. (b) CETSA  
1905 of ATF4 with 3 $\mu$ M PP. Both representative blot and quantification from independent replicates are  
1906 shown (n=2 for DMSO and n=3 for PP). (c) Computational prediction of IDR in mouse SRSF2  
1907 (SC35) protein. (d) Diagram illustrating the constructs for droplet formation assay (e)  
1908 Representative images of droplet formation assay with different concentrations of recombinant  
1909 protein at 125mM NaCl. (f) Representative images of droplet formation assay with different salt  
1910 concentrations with 20 $\mu$ M recombinant proteins. (g, h) Representative images of droplet  
1911 formation assay with different recombinant proteins (g) and quantification (h) of area-normalized  
1912 perimeter changes in the time span of 20 minutes with 50mM NaCl (n=3). (i) Alignment of protein  
1913 sequences of SON orthologs in seven different species. SON IDR2 is located within the most  
1914 conserved region (highlighted by light yellow). Data: Mean  $\pm$  S.E.M. Statistical tests used: Two-  
1915 way ANOVA for b and one-way ANOVA for h.

1916

1917

1918

1919

1920

1921

1922

1923

1924

1925

1926

1927

1928

1929

1930

1931

1932

1933

1934

1935

1936

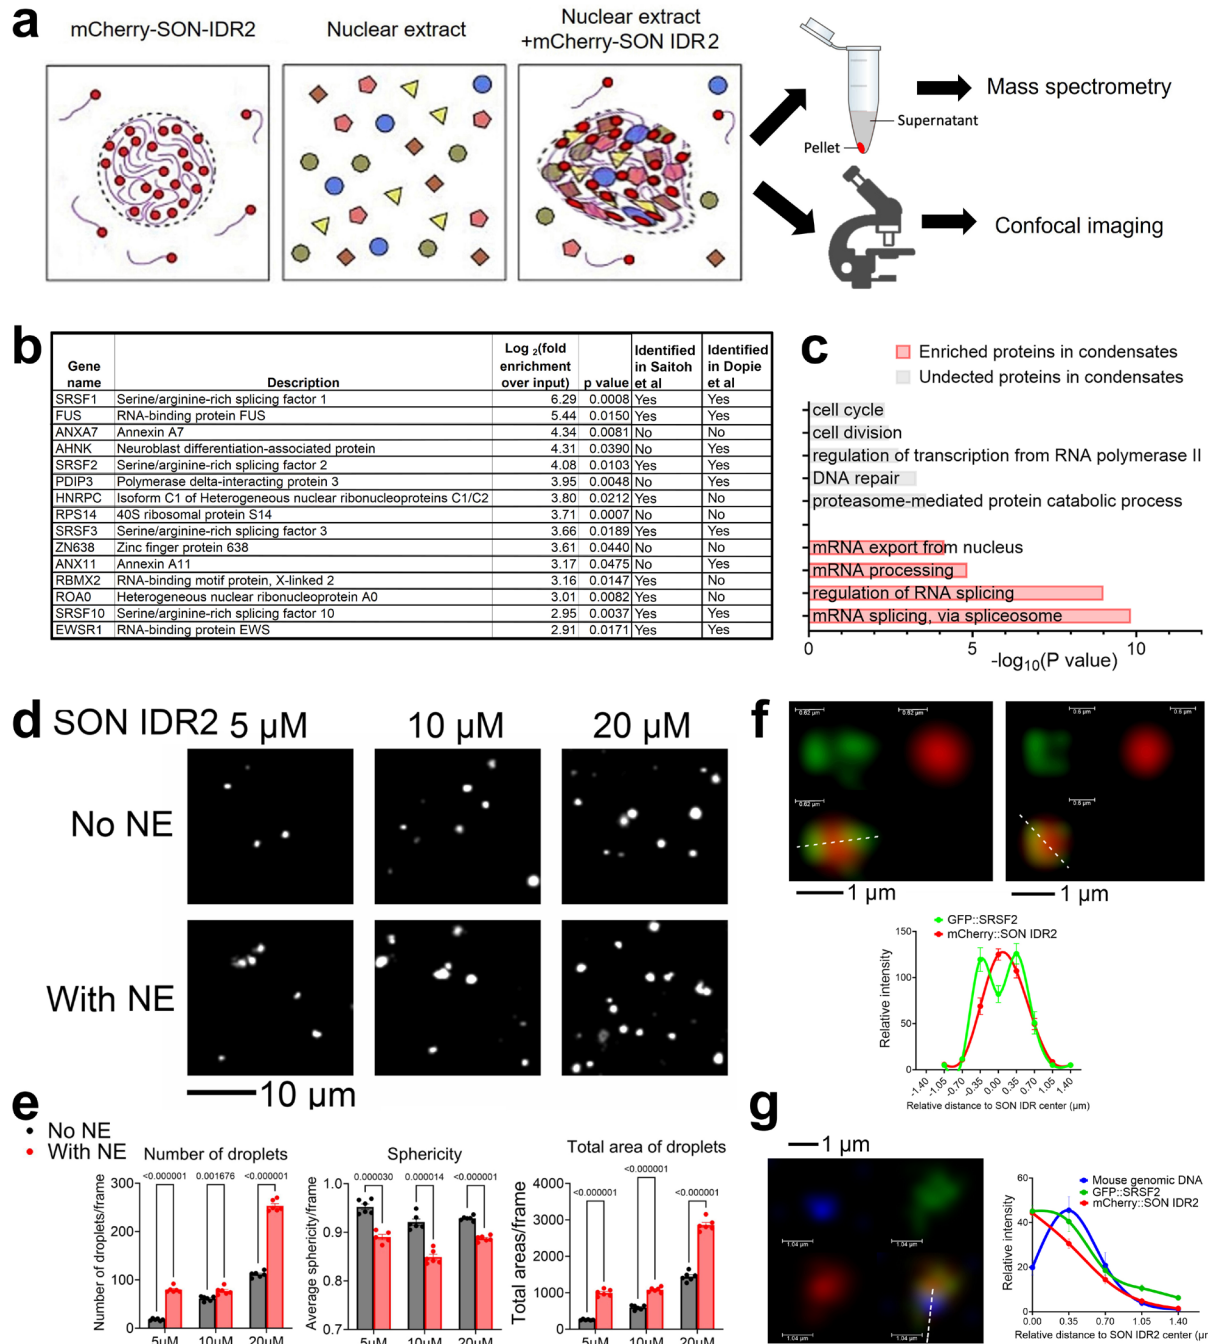

1937

1938 **Supplementary Figure 15. PP modulates nuclear speckle LLPS dynamics in a cell-free**  
 1939 **system.** (a) Diagram showing NE-supplemented SON IDR2 condensates are expected to  
 1940 compartmentalize splicing factors and exhibit less spherical morphology. (b) NE-supplemented  
 1941 SON IDR2 condensates are spun down and subject to mass spectrometry. Top 15 proteins mostly  
 1942 enriched in SON IDR2-compartmentalized condensates with p value<0.05, and the status of  
 1943 whether these proteins have been identified in nuclear speckles in cells in two datasets<sup>52, 53</sup> (c)  
 1944 GO of top enriched biological pathways of proteins depleted or enriched in SON IDR2-  
 1945 compartmentalized condensates. (d, e) Representative images of droplet formation assay with

1946 increasing concentration of SON IDR2 with or without NE supplementation **(e)** and quantification  
1947 **(e)** of the number, sphericity and total areas of droplets (n=6). **(f)** Representative images and  
1948 quantification of spatial distribution of mCherry::SON IDR2 and GFP::SRSF2. **(g)** Representative  
1949 images and quantification of spatial distribution of mCherry::SON IDR2, GFP::SRSF2 and mouse  
1950 genomic DNA. Data: Mean  $\pm$  S.E.M. Statistical tests used: unpaired one-tailed Student's t-test for  
1951 e.

1952

1953

1954

1955

1956

1957

1958

1959

1960

1961

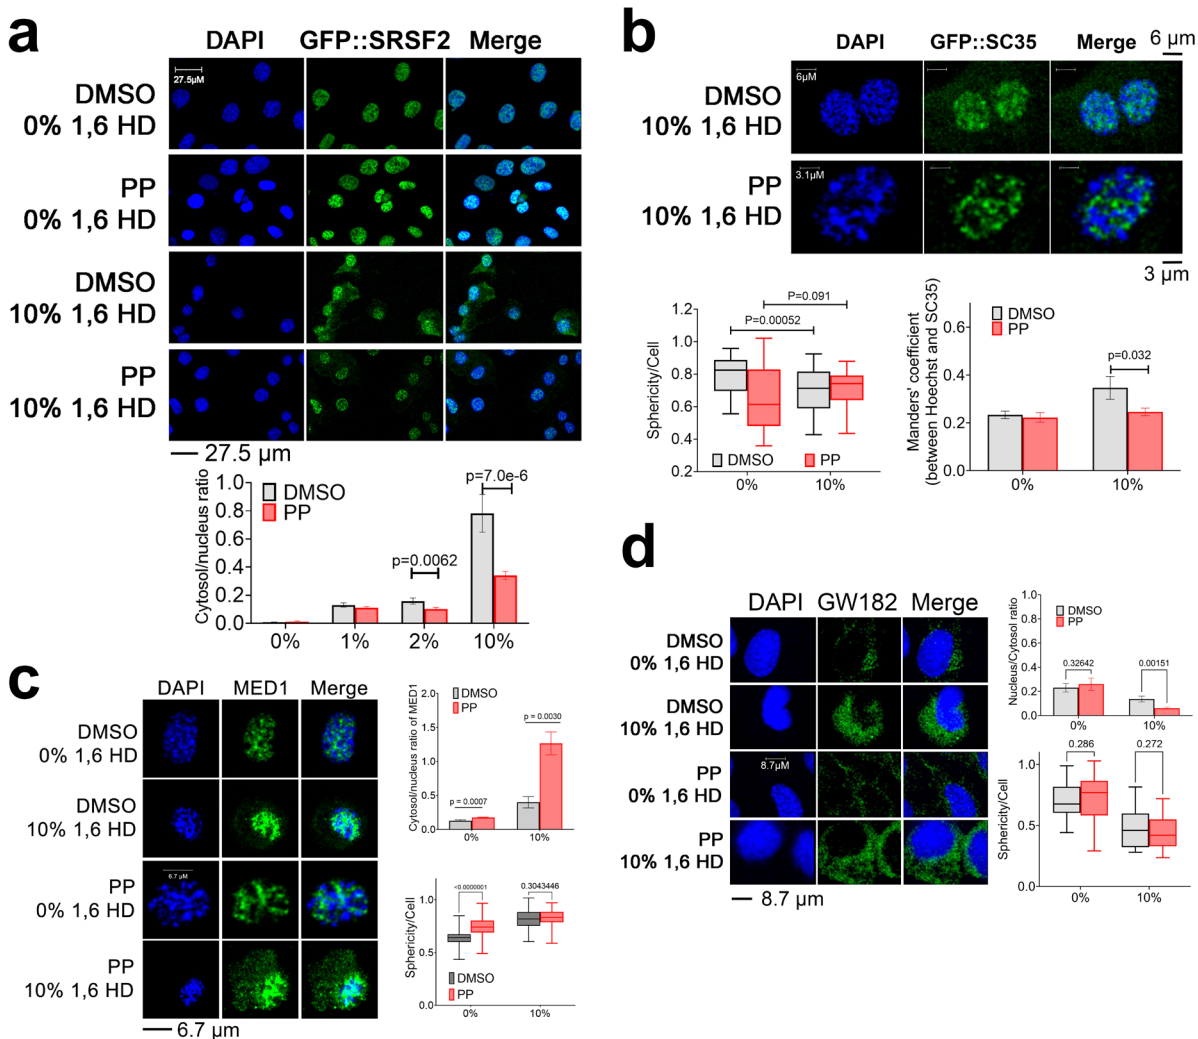

1962

1963 **Supplementary Figure 16. PP alters the sensitivity of different condensates to 1,6**  
 1964 **hexanediol.** (a) 1,6 hexanediol sensitivity assay with representative images and quantification  
 1965 (n=20~95) of the ratio of cytosol over nuclear intensity of GFP::SRSF2 signal. (b) 1,6 hexanediol  
 1966 sensitivity assay with representative images and quantification of sphericity (n=24~50) of  
 1967 GFP::SRSF2 signal and Manders' coefficient (n=10~14) of signals of GFP and Hoechst. (c) 1,6  
 1968 hexanediol sensitivity assay with representative images and quantification of ratio of cytosol to  
 1969 nuclear MED1 signal (n=19~29) and sphericity of MED1 signal (n=31~75). (d) 1,6 hexanediol  
 1970 sensitivity assay with representative images and quantification of ratio of cytosol to nuclear  
 1971 GW182 signal (n=16~54) and sphericity (n=19~97) of GW182 signal. Data: Mean ± S.E.M.  
 1972 Statistical tests used: unpaired one-tailed Student's t-test for all data.

1973

1974

1975

1976

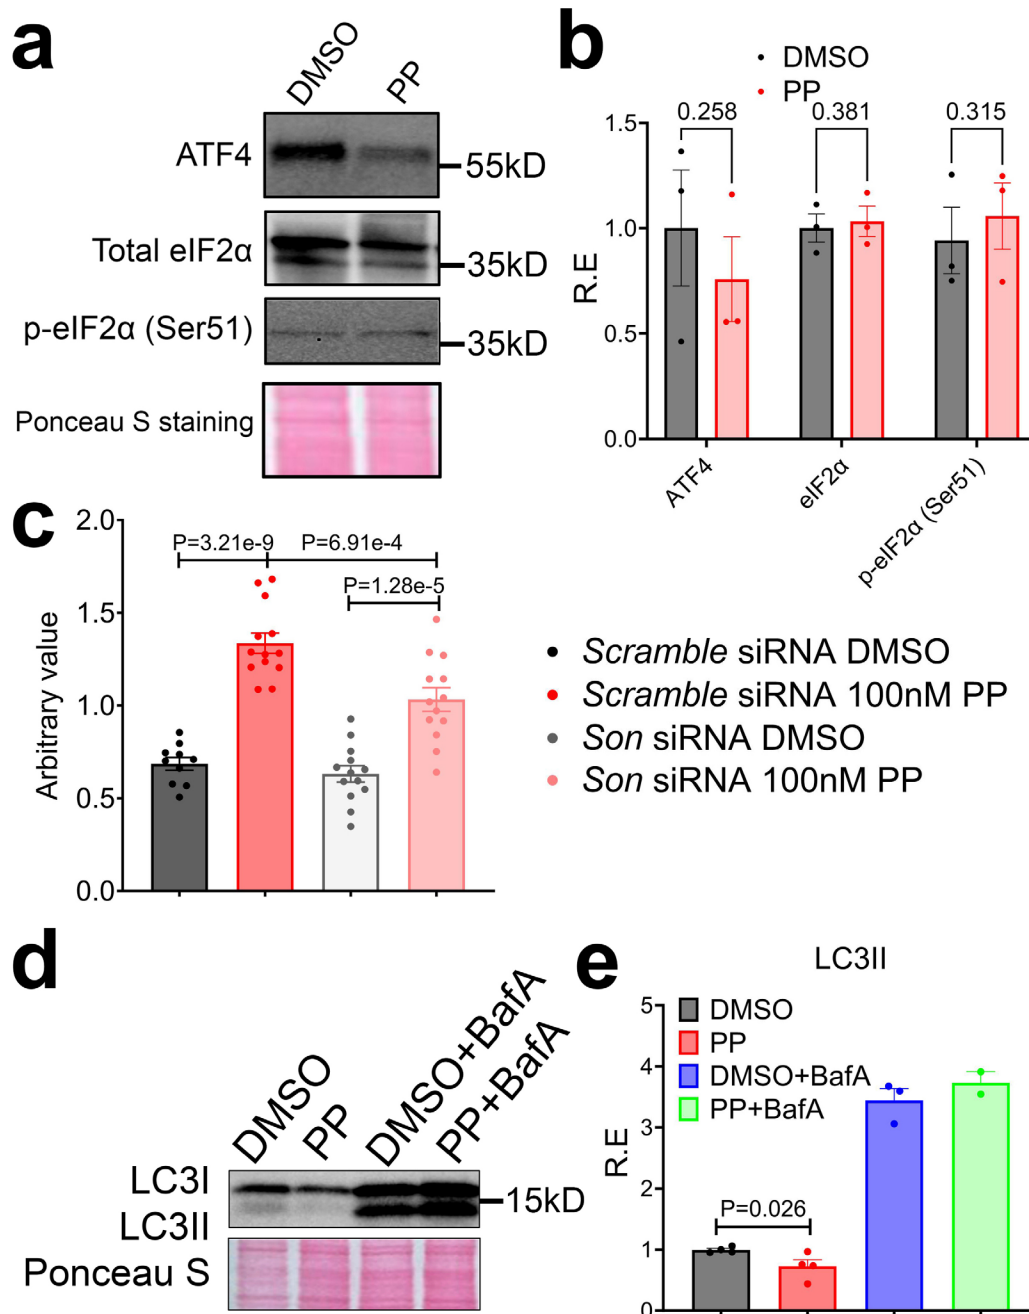

1977

1978 **Supplementary Figure 17. Nanomolar concentration of PP promotes UPS and ALP without**  
 1979 **inducing cellular stress.** (a, b) MEFs were treated with DMSO or 100nM PP for 24 hours.  
 1980 Representative western blot (a) and quantification (b) of different proteins (n=3). (c) MEFs were  
 1981 transiently transfected with scrambled or Son siRNA for 24 hours before treated with DMSO or  
 1982 100nM PP for another 24 hours. 20S proteasome activity assay was then performed (n=10~13).  
 1983 (d, e) MEFs were treated with vehicle control or 1μM PP for ~22 hours and then co-treated with  
 1984 or without Baf A (100nM for 22 hours) (n=2~4). Representative western blot image (d) and  
 1985 quantification (e) of LC3II and LC3II/LC3I ratio. Data: Mean ± S.E.M. Statistical tests used:  
 1986 unpaired one-tailed Student's t-test for all data.

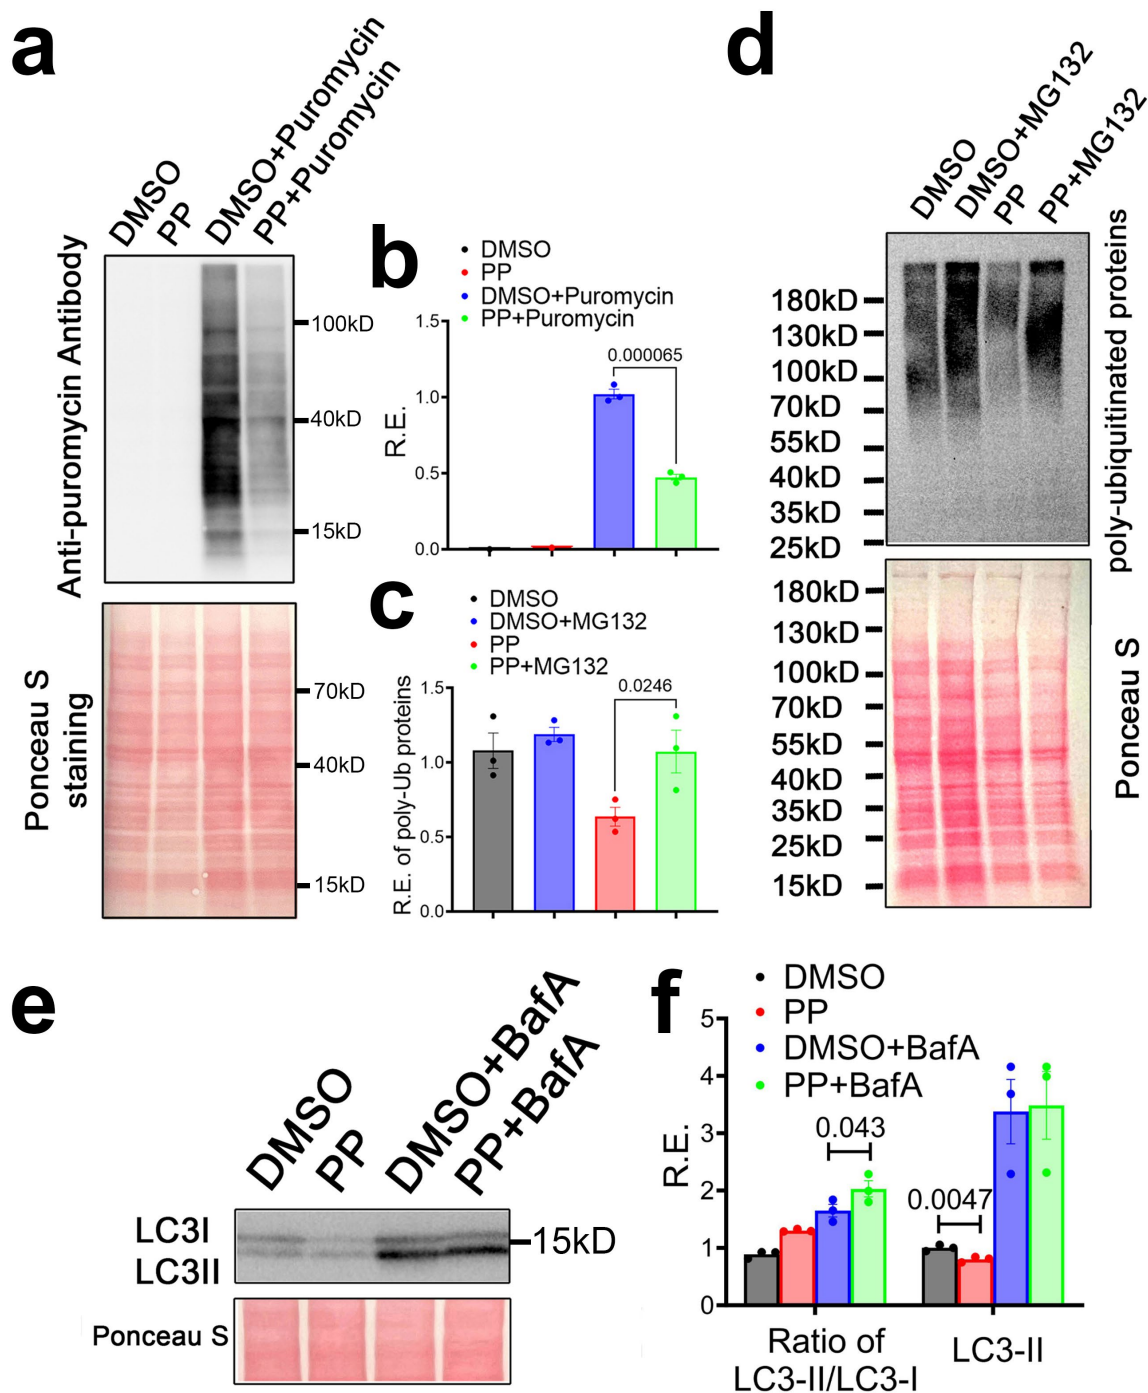

1987

1988 **Supplementary Figure 18. Micromolar PP promotes autophagy and UPS activity and**  
 1989 **represses translation.** MEFs were treated with vehicle control or 1 $\mu$ M PP for ~24 hours (22  
 1990 hours for **e** and **f**) and then co-treated with or without puromycin (10  $\mu$ g/mL for 30 minutes),  
 1991 MG132 (10 $\mu$ M for 110 minutes) or Baf A (100nM for 22 hours) (n=3 for all samples). Western blot  
 1992 and quantification of puromycin-incorporated proteins (**a**, **b**), poly-ubiquitinated protein (**c**, **d**) and  
 1993 LC3II and LC3II/LC3I ratio (**e**, **f**). Data: Mean  $\pm$  S.E.M. Statistical tests used: unpaired one-tailed  
 1994 Student's t-test for all data.

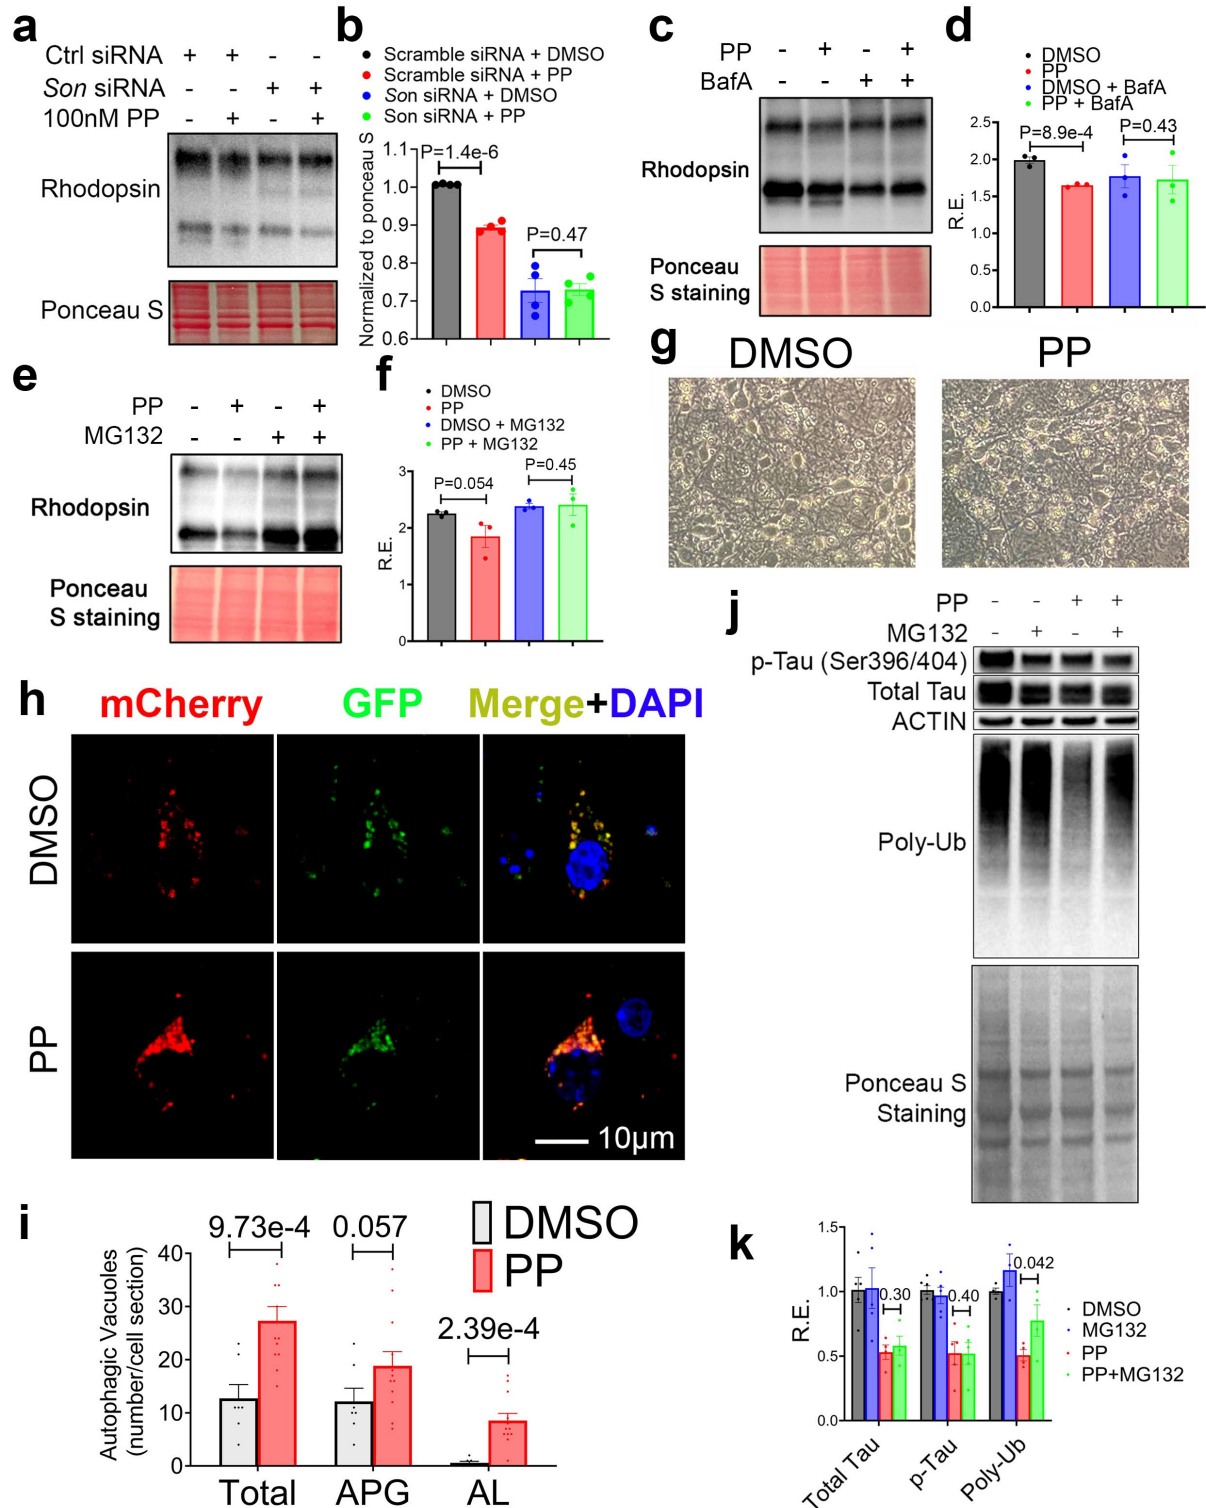

1995

1996 **Supplementary Figure 19. Pyrvinium pamoate reduces pathological Tau and Rhodopsin**  
 1997 **level by boosting autophagy and UPS activity.** (a, b) NIH3T3 RHO<sup>P23H</sup> cells were transfected  
 1998 with scrambled or *Son* siRNA for 24 hours before treated with DMSO or 0.1µM PP for another 24  
 1999 hours. Western blot (a) and quantification (b) of RHO<sup>P23H</sup> level (n=4). (c, d) NIH3T3 RHO<sup>P23H</sup> cells



2000 were treated with 0.1 $\mu$ M PP and co-treated with or without BafA (100nM) for 24 hours. Western  
2001 blot **(c)** and quantification **(d)** of RHO<sup>P23H</sup> level (n=3). **(e, f)** NIH3T3 RHO<sup>P23H</sup> cells were co-treated  
2002 with or without MG132 (10 $\mu$ M for 120 minutes). Western blot **(e)** and quantification **(f)** of RHO<sup>P23H</sup>  
2003 level (n=3). **(g)** Representative images of primary mouse neurons treated with DMSO or 0.5  $\mu$ M  
2004 PP for 24 hours. **(h, i)** Representative images showing an increase of the number of mCherry  
2005 positive puncta in primary neurons cultured in the presence of 0.1 $\mu$ M PP for 12 hours, with  
2006 zoomed in images of regions marked with white rectangles **(h)**. Quantification of the number of  
2007 total vacuoles, autophagosome and autolysosomes (n=7~12) **(i)**. **(j, k)** Tau P301S-expressing  
2008 primary neurons were co-treated with vehicle or 0.1 $\mu$ M PP in the presence or absence of MG132  
2009 (10 $\mu$ M) for 12 hours and western blot **(j)** and quantification **(k)** of different proteins (n=3~5). All  
2010 data mean  $\pm$  S.E.M. Statistical tests used: unpaired one-tailed Student's t-test for all data.

2011

2012

2013

2014

2015

2016

2017

2018

2019

2020

2021

2022

2023

2024

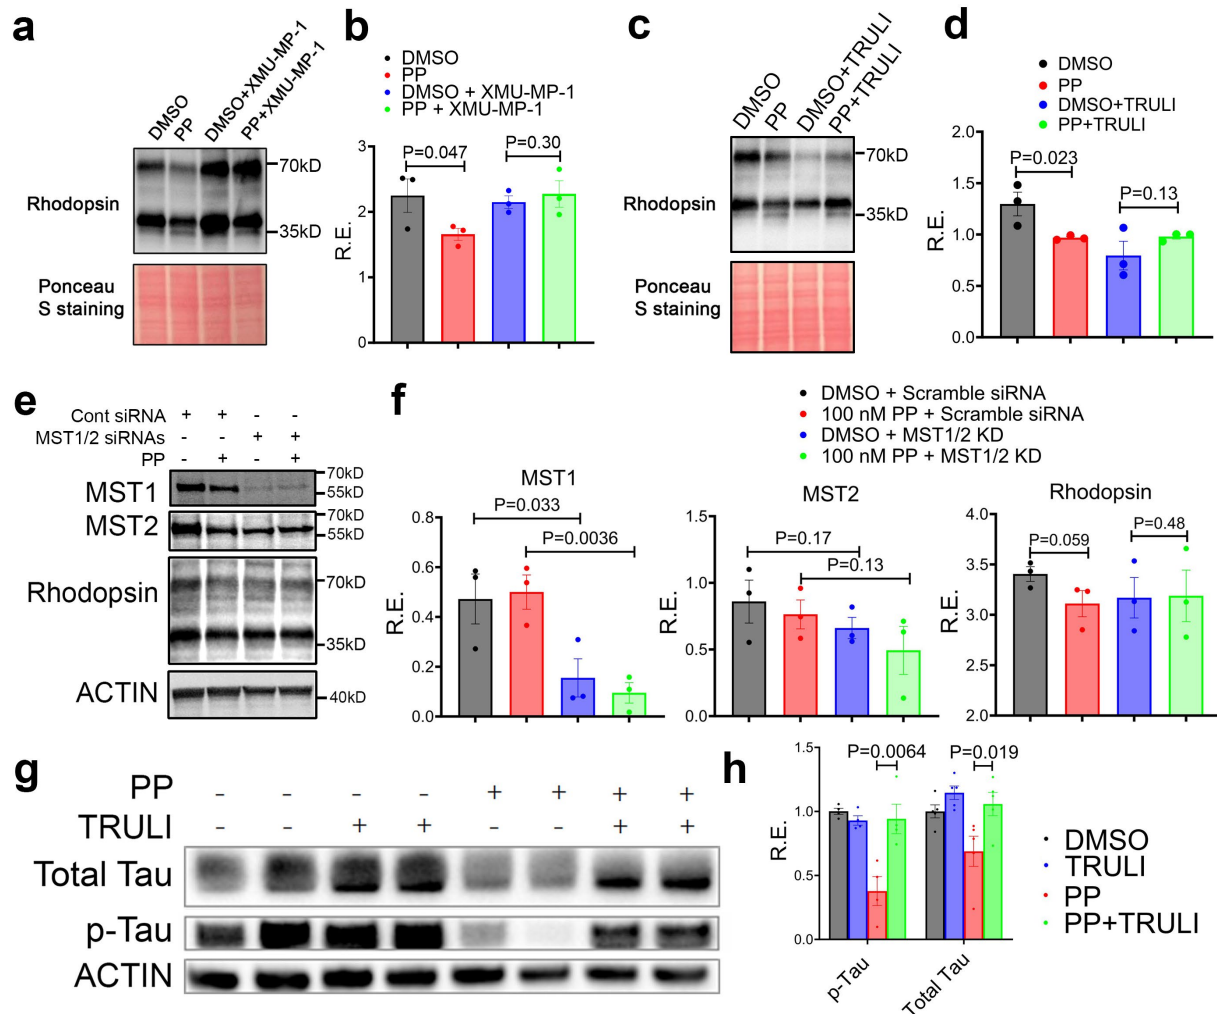

2025

2026 **Supplementary Figure 20. Pyruvium pamoate reduces pathological Rhodopsin level in a**  
 2027 **manner that depends on reduced YAP1 activity.** (a, b) NIH3T3 RHO<sup>P23H</sup> cells were treated  
 2028 with 0.1μM PP for 24 hours and co-treated with or without XMU-MP-1 (1μM). Western blot (a)  
 2029 and quantification (b) of RHO<sup>P23H</sup> level (n=3). (c, d) NIH3T3 RHO<sup>P23H</sup> cells were treated with 0.1μM  
 2030 PP for 24 hours and co-treated with or without TRULI (1μM). Western blot (c) and quantification  
 2031 (d) of RHO<sup>P23H</sup> level (n=3). (e, f) NIH3T3 RHO<sup>P23H</sup> cells were transiently transfected with  
 2032 scrambled or Mst1/Mst2 siRNAs for 24 hours and then treated with DMSO or 0.1μM PP for  
 2033 another 24 hours. Western blot (e) and quantification (f) of MST1/2 and RHO<sup>P23H</sup> level (n=3). (g,  
 2034 h) Tau P301S-expressing primary neurons were co-treated with vehicle or 0.1μM PP in the  
 2035 presence or absence of YAP1 activator TRULI (10μM) for 12 hours and western blot (g) and  
 2036 quantification (h) of different proteins (n=4). All data: mean ± S.E.M. Statistical tests used:  
 2037 unpaired one-tailed Student's t-test for all data.

2038

2039

2040

## Genes upregulated by PP

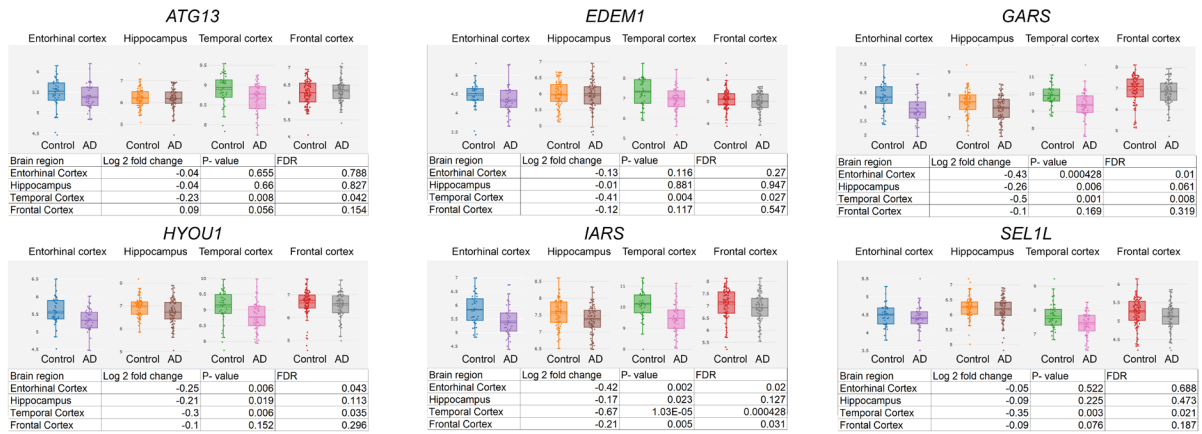

## Genes downregulated by PP

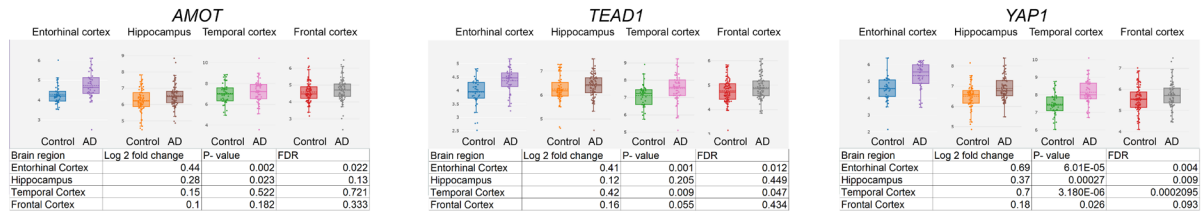

2041  
2042  
2043  
2044  
2045  
2046  
2047  
2048  
2049  
2050  
2051  
2052  
2053  
2054  
2055  
2056  
2057  
2058

**Supplementary Figure 21. Gene signatures in human AD subjects are opposite from those regulated by PP revealed by bulk RNA-Seq. Relative gene expressions in different brain regions of human AD subjects normalized to control subjects as reported in <sup>87</sup>.**

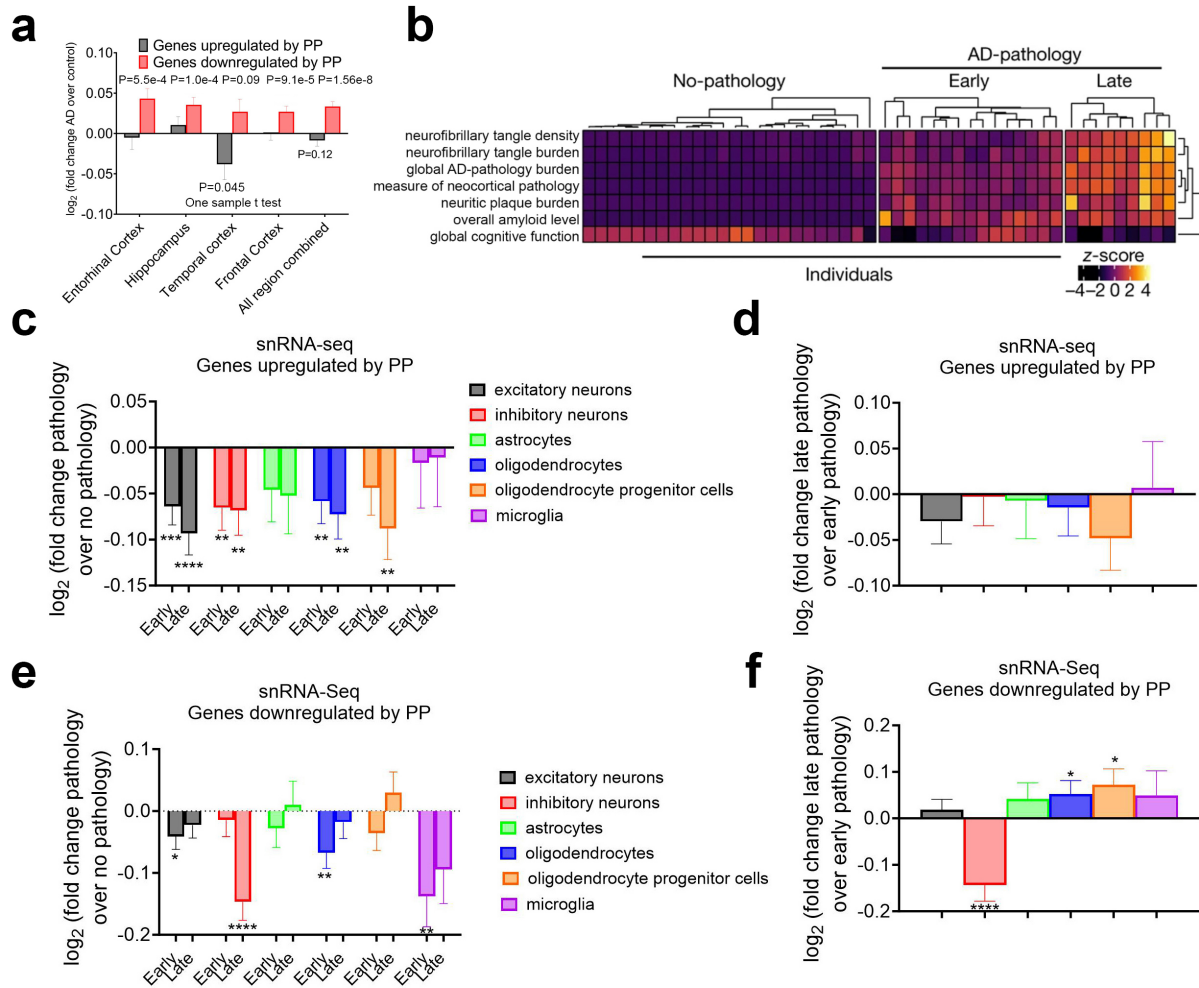

2059

2060 **Supplementary Figure 22. Gene signatures in late-stage human AD subjects with severe**  
 2061 **tauopathy are opposite from those regulated by PP. (a)** Log<sub>2</sub> transformed values of fold  
 2062 change of gene expression of different individual or combined brain regions of AD versus control  
 2063 human subjects for top genes that were either upregulated or downregulated by PP (with a log<sub>2</sub>  
 2064 fold change > 1.5) in MEFs. **(b)** Phenotypic clustering of 48 individuals (columns) using seven  
 2065 clinicopathological variables as reported and adapted from<sup>88</sup>. **(c-f)** Log<sub>2</sub> transformed values of  
 2066 fold change of mean gene expression of different cell types of early or late AD versus no pathology  
 2067 human subjects for top genes that were either upregulated **(c)** or downregulated by PP in MEFs  
 2068 **(e)**. Log<sub>2</sub> transformed values of fold change of mean gene expression of different cell types of  
 2069 late AD versus early AD human subjects for top genes that were either upregulated **(d)** or  
 2070 downregulated by PP in MEFs **(f)**. Data: Mean ± S.E.M. Statistical tests used: unpaired one-tailed  
 2071 Student's t-test for a. One sample t-test (one-tailed). \* p<0.05, \*\* p<0.01, \*\*\* p<0.001, \*\*\*\*  
 2072 p<0.0001 for c-f.

2073

2074

2075

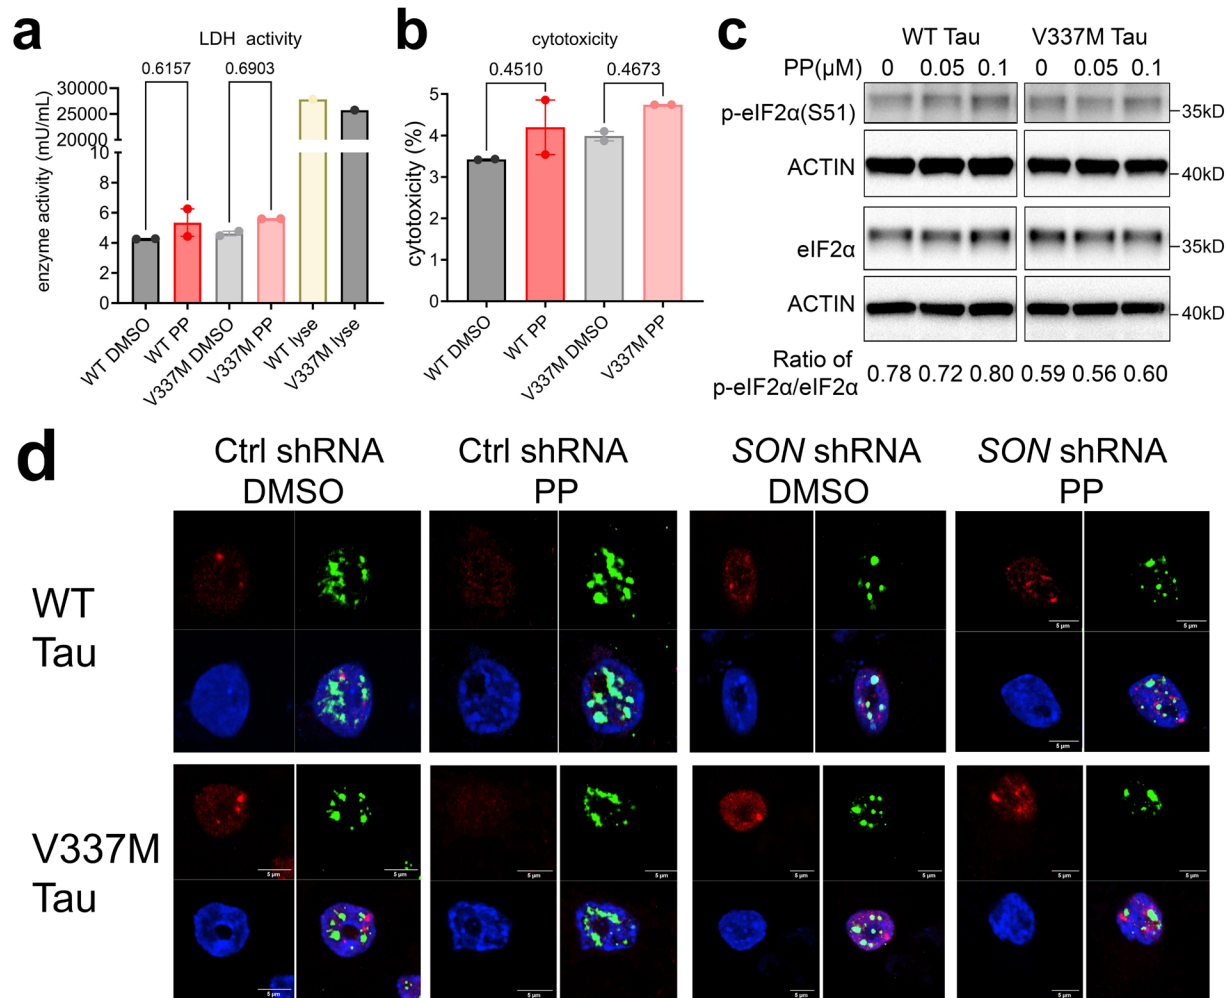

2076

2077 **Supplementary Figure. 23. Nanomolar PP rejuvenates nuclear speckles and alleviates tau**  
 2078 **burden in human iPSC-neurons expressing mutant Tau in a SON-dependent manner**  
 2079 **without causing cellular stress.** (a-b) WT and V337M Tau-expressing iPSC neurons were  
 2080 treated with 500 nM PP for 24 hours and LDH release assay were performed. LDH enzyme activity  
 2081 (a) and normalized cytotoxicity (b) were shown. (c) WT and V337M Tau-expressing iPSC neurons  
 2082 were treated with increasing concentration of PP for 12 hours and western blot of eIF2α and p-  
 2083 eIF2α were performed. The ratio of p-eIF2α to total eIF2α were calculated. (d) Wild-type and  
 2084 V337M Tau-expressing iPSC-neurons were infected with scrambled shRNA or SON shRNA-  
 2085 encoding lentivirus and treated with DMSO or PP (100nM) for 12 hours, and IF against nuclear  
 2086 speckle (Ab11826 against SRRM2), p-Tau (Ser422) and chromatin (DAPI) were performed.

2087

2088

2089

2090

2091

2092

2093

2094

2095

2096 **Supplemental Movie legends:**

2097 **Movie S1.** Time lapse imaging of droplet formation with 20 $\mu$ m SON IDR1 in 125mM NaCl.

2098 **Movie S2.** Time lapse imaging of droplet formation with 20 $\mu$ m SON IDR2 in 125mM NaCl.

2099 **Movie S3.** Time lapse imaging of droplet formation with 20 $\mu$ m SRSF2 in 125mM NaCl.

2100 **Movie S4.** Time lapse imaging of droplet formation with 10 $\mu$ m SON IDR2 supplemented with  
2101 0.6mg/ml GFP::SRSF2 MEF NE.

2102

2103

2104

2105

2106

2107

2108

2109
